# Supplementary material for: Enzymatic preparation of casein hydrolysates with high digestibility and low bitterness studied by peptidomics and random forests analysis
Source: Royal Society of Chemistry journal article supplement (doi:10.1039/d3fo01222k), 2023-01-01
Supplement: d3fo01222k1.xlsx [file d3fo01222k1.xlsx]

## Sheet: precipitation ratio
	Trypsin		Alcalase		Papain		Neutrase		Flavouryme
	average (%)	SD	average (%)	SD	average (%)	SD	average (%)	SD	average (%)	SD
DH=3%	82.86	0.55	96.66	2.04	95.34	0.91	98.18	1.57	96.67	0.02
DH=5.5%	36.06	0.97	18.95	2.29	6.07	1.11	23.87	2.33	68.44	1.88
DH=8%	22.93	1.54	2.12	1.1	0	0.34	7.04	0.34	27.06	2.61
DH=10.5%	3.57	0.36	0.25	0.35	0	0.96	1.67	2.37	3.08	0.48
DH=13%	0.43	0.6	0	0	0	0.31	0	1.86	2.65	0.6

## Sheet: digestibility
	Trypsin		Alcalase		Papain		Neutrase		Flavouryme
	average (%)	SD	average (%)	SD	average (%)	SD	average (%)	SD	average (%)	SD
DH=3%	61.34	0.33	48.12	0.69	43.36	0.22	45.49	0.5	45.71	1.74
DH=5.5%	76.99	2.36	72.05	2.42	90.13	1.41	61.81	0.87	69.79	1.32
DH=8%	80.12	0.08	85.62	2.18	99.72	0.06	70	2.32	78.72	2.8
DH=10.5%	83.99	0.5	93.77	2.02	96.12	0.32	79.79	0.29	85.86	1.66
DH=13%	97.74	1.95	99.23	0.19	98.88	0.65	92.33	3.21	89.38	2.51

## Sheet: bitterness
	Trypsin		Alcalase		Papain		Neutrase		Flavouryme
	average	SD	average	SD	average	SD	average	SD	average	SD
DH=3%	0.57	0.31	0.29	0.13	0.14	0.1	0.37	0.09	0.17	0.11
DH=5.5%	1.35	0.13	1.22	0.139604	3.64	0.157702	2.17	0.24	1.03	0.16
DH=8%	3.08	0.31	1.43	0.21	4.17	0.27	3.15	0.22	1.37	0.12
DH=10.5%	3.12	0.4	1.87	0.306561	4.53	0.23	3.54	0.49	1.34	0.15
DH=13%	3.17	0.15	3.85	0.22	5	0	4.37	0.18	1.58	0.37

## Sheet: protein content
	Trypsin		Alcalase		Papain		Neutrase		Flavouryme
	average (μg/mL)	SD	average (μg/mL)	SD	average (μg/mL)	SD	average (μg/mL)	SD	average (μg/mL)	SD
DH=3%	1512.08	225.36	519.16	250.53	224.52	202.26	690.76	127.63	280.07	145.35
DH=5.5%	4462.09	56.86	4118.39	272.83	5551.08	516.48	4698.72	321.4	2072.99	208.64
DH=8%	4779.85	170.57	5083.38	78.22	6112.26	176.09	5214.41	39.68	3739.79	132.66
DH=10.5%	5734.29	11.93	5057.4	333.93	5862.65	263.55	5688.04	279.47	4924.19	26.34
DH=13%	6208.64	74.16	5150.56	28.92	5206.21	36.85	5402.58	67.61	4876.76	507.92

## Sheet: Peptide identification_trypsin
sequence	peak area
	DH=3%	DH=5.5%	DH=8%	DH=10.5%	DH=13%
AF	0	0	0	3737857	4.53832e+06
AK	0	0	1.08027e+06	5016208	4521508
AKPAAVR	0	0	0	67266	58786
ALNEINQF	0	0	0	631870	289736
ALNEINQFY	0	62616	104360	367592	654044
ALNEINQFYQK	0	52994	1030714	510124	493610
ALNEINQFYQKFPQYLQY	0	354378	123094	0	0
ALNEINQFYQKFPQYLQYLYQGPIVLNPWDQVK	0	0	425354	0	0
ALPQYLK	0	875324	836712	550132	4863424
AMKPW	0	1.48967e+06	1.59786e+06	4446368	3.60373e+06
AMKPWIQPK	509270	419434	273276	48436	0
AMKPWIQPKTK	74882	0	0	0	0
AMKPWIQPKTKVIPYVRYL	12926	0	0	0	0
APFPEVFGK	0	0	32386	0	0
APK	0	0	5090428	0	5444971
APSFSDIPNPIGSENSEK	0	0	0	74028	0
AQILQWQVLSNTVPAK	0	0	47386	0	0
AQQKEPMIGVNQELAYFYPELFR	0	78690	0	0	0
AQTQ	0	0	0	0	1.75302e+06
AQTQSL	0	0	0	665413	6023154
AQTQSLV	0	0	0	0	308362
AQTQSLVYPFPGP	0	0	0	0	137770
AQTQSLVYPFPGPIPN	0	0	0	397318	772892
AQTQSLVYPFPGPIPNSLPQ	0	0	0	0	89652
AQTQSLVYPFPGPIPNSLPQN	0	0	0	0	71312
AR	0	0	0	468165	1.18758e+06
ARHPHPHLSF	0	28358	0	0	0
AVPYPQR	75802	1823220	3420182	3019842	3429820
AVPYPQRDMPIQAF	0	543502	0	0	0
AVPYPQRDMPIQAFLLYQEPV	0	2040166	0	0	0
AVPYPQRDMPIQAFLLYQEPVLGPVR	0	108960	0	0	0
AVPYPQRDMPIQAFLLYQEPVLGPVRGPFPIIV	1584956	1968670	385234	0	0
AYF	0	0	0	0	1.03691e+06
AYFYPELF	0	0	0	0	126904
AYFYPELFR	0	0	0	305302	0
DAYPSGAW	0	0	0	0	95414
DDKHYQK	0	0	154980	52550	0
DER	0	0	0	1.20396e+06	1.73266e+06
DIPNPIGSENSEK	0	0	79096	0	133630
DMPIQAF	0	763680	440304	6778158	12942394
DMPIQAFL	0	135454	88896	652674	330708
DMPIQAFLL	0	36892	0	146720	0
DMPIQAFLLY	0	104872	252898	696132	0
DMPIQAFLLYQE	0	152222	36338	0	0
DMPIQAFLLYQEPVLGPVR	0	168146	374738	1376890	122198
DMPIQAFLLYQEPVLGPVRGP	0	0	402176	0	0
DMPIQAFLLYQEPVLGPVRGPFPI	0	0	51714	0	0
DMPIQAFLLYQEPVLGPVRGPFPII	0	224616	471860	0	0
DMPIQAFLLYQEPVLGPVRGPFPIIV	119976	306606	485060	114704	134192
DQVK	0	0	0	208489	638322
EAMAPK	0	5.57311e+06	6957014	9320609	9288761
EAMAPKHK	27054	0	0	0	0
EDVPSER	0	108904	247262	636530	840576
EDVPSERY	0	29882	34620	134348	101474
EGIHAQQK	0	0	214726	635226	1495110
EGIHAQQKEPM	0	0	86180	0	0
EGIHAQQKEPMIGVNQELAY	0	52652	199060	280472	0
EGIHAQQKEPMIGVNQELAYF	0	130638	138770	217580	0
EGIHAQQKEPMIGVNQELAYFYPELF	0	0	0	335242	0
EGIHAQQKEPMIGVNQELAYFYPELFR	0	191234	1616020	89912	0
EK	0	915901	1.98902e+06	10229420	13725310
EKVNELSK	0	445348	545256	73744	39598
ELAYFYPELFR	0	105016	0	0	0
ELEELNVPG	0	0	0	114578	216502
ELEELNVPGEIVESLSSSEES	0	0	0	209860	187548
ELEELNVPGEIVESLSSSEESITR	0	0	0	128342	0
EMPFPK	0	2.33681e+06	9343897	18546264	18531344
EMPFPKYPVEPF	0	410422	43550	0	0
EMPFPKYPVEPFTESQSL	0	84740	0	0	0
EMPFPKYPVEPFTESQSLTLTDVEN	756628	0	0	0	0
EPM	0	0	0	2.79475e+06	3.77969e+06
EPMIGVN	0	0	0	0	268882
EPMIGVNQEL	0	0	0	90890	590206
EPMIGVNQELAY	0	0	0	862764	761096
EPMIGVNQELAYF	0	0	0	3826278	5472070
EPMIGVNQELAYFY	0	0	0	0	204968
EPMIGVNQELAYFYPELF	0	0	18812	1792156	1882452
EPMIGVNQELAYFYPELFR	0	27958	1220334	2367200	239386
EQKHIQKEDVPSERYLGYLEQLLR	0	0	67982	144388	0
EQLSTSEENSKK	0	0	9108	0	0
ER	0	0	0	560926	893955
ESIISQETYKQEK	39280	138184	369294	0	0
EVFGKEK	0	75584	0	0	0
EVLNENLLR	0	33214	0	0	0
EVVR	0	996410	1.56496e+06	2.16902e+06	2.2016e+06
FALPQYL	0	155908	99614	386450	230854
FALPQYLK	124852	3217456	254084	2064266	154830
FALPQYLKTVY	0	46500	0	0	0
FALPQYLKTVYQHQK	43530	0	0	0	0
FF	0	8391313	1.78433e+06	10492587	31304554
FFSDK	0	0	863985	6.24344e+06	4.80368e+06
FFSDKIAK	0	183134	5877240	0	0
FFSDKIAKYIPIQY	0	65572	63966	0	0
FFVAPFPEVF	28834	861992	537454	1791346	505808
FFVAPFPEVFG	41162	112784	116706	0	0
FFVAPFPEVFGK	1432370	706068	372938	331800	1620594
FFVAPFPEVFGKEK	1888678	15302174	3138328	0	0
FFVAPFPEVFGKEKV	67746	0	0	0	0
FFVAPFPEVFGKEKVN	23636	0	0	0	0
FFVAPFPEVFGKEKVNELSK	97294	172528	0	0	0
FLK	0	0	0	0	34147.5
FLL	0	0	0	0	950961
FLLYQEPVLGPVR	0	0	0	101426	414562
FMAIPPK	0	0	184344	38340	76270
FPIIV	0	0	0	0	983128
FPPQSVLSLSQSK	0	336472	155318	0	0
FPQYL	0	0	0	0	5786916
FPQYLQY	0	0	0	1418432	765992
FPQYLQYLYQGPIVLNPWDQVK	0	0	0	249812	65844
FPQYLQYLYQGPIVLNPWDQVKR	0	73550	187002	0	0
FQSEEQQQTEDELQDK	0	0	0	187094	91140
FQSEEQQQTEDELQDKIHPF	0	103632	57446	200300	0
FVAPFPEVF	0	0	0	375184	3506300
FVAPFPEVFGK	0	361774	443982	1922598	3303426
FVAPFPEVFGKEK	0	150562	81338	0	0
FYPELF	0	0	0	6904105	39852696
FYPELFR	0	177920	78576	1010280	144860
FYQL	0	0	0	0	415691
GK	0	0	0	0	272107
GLNYY	0	0	0	1.094e+06	5877960
GLPQEVLNENLLR	43224	73338	100750	0	0
GPFPII	0	0	0	1.0936e+06	1.91532e+06
GPFPIIV	0	152282	95604	147656	1767124
GVSK	0	232705	0	0	1.48286e+06
GYLEQLLR	0	88140	63220	0	130768
HIQK	0	0	0	1.79659e+06	1.42199e+06
HIQKEDVPSER	0	1225594	4488882	649314	0
HIQKEDVPSERY	0	81054	64296	0	0
HIQKEDVPSERYLGY	0	45458	0	0	0
HIQKEDVPSERYLGYLEQLLR	0	315192	56302	0	0
HKEMPFPK	86852	83016	171908	42880	0
HKEMPFPKYPVEPF	0	385462	61984	0	0
HKEMPFPKYPVEPFT	210618	901800	0	0	0
HKEMPFPKYPVEPFTE	0	67780	0	0	0
HKEMPFPKYPVEPFTESQSLTLTDVEN	0	928102	911594	0	0
HLPLPLLQ	0	0	0	0	253334
HLPLPLLQSW	0	0	0	359106	482610
HLPLPLLQSWM	0	0	0	0	128746
HPHLSFM	0	149926	0	93432	0
HPHLSFMAIPPK	0	0	71696	0	0
HPHPHLSF	0	750178	583482	638302	596490
HPHPHLSFM	0	404270	526642	203034	105752
HPHPHLSFMAIPPK	0	0	42404	0	0
HPHPHLSFMAIPPKK	0	35676	45382	0	0
HPIK	0	0	0	2.02278e+06	1.45976e+06
HPIKHQGLPQEVLNENLLR	0	291060	491640	144842	0
HQGLPQEV	0	55264	134704	0	0
HQGLPQEVLNENL	0	0	0	0	112774
HQGLPQEVLNENLL	0	0	0	0	556832
HQGLPQEVLNENLLR	87016	690068	1705528	4533958	491754
HQPHQPLPPTVM	0	141478	0	0	0
HQPHQPLPPTVMF	0	0	0	0	80158
HQPHQPLPPTVMFPPQSVL	0	102906	0	591312	1292420
HYQK	0	0	0	550012	346430
I/LH	0	0	0	276599	852171
I/LK-1	0	0	0	0	3.65629e+06
I/LN	0	0	0	0	219358
I/LQY	0	0	0	0	672196
I/LR-1	0	0	0	0	542902
I/LR-2	0	0	0	0	185276
IEK	0	0	0	4291372	5929648
IEKFQSEEQQQTEDELQDK	0	0	0	83072	69824
IGVNQEL	0	0	0	0	95354
IGVNQELAY	0	0	0	158672	481500
IGVNQELAYF	0	0	0	159354	427510
IGVNQELAYFYPELF	0	0	0	72858	89710
IGVNQELAYFYPELFR	0	95984	251250	302100	0
IHPF	0	0	0	7308641	16432579
IHPFAQTQ	0	0	0	264370	159892
IHPFAQTQSL	0	0	0	596604	547260
IHPFAQTQSLVY	0	0	0	31434	0
IHPFAQTQSLVYPFPGPIPN	0	0	0	611724	0
IHPFAQTQSLVYPFPGPIPNSLPQ	0	0	0	280862	0
IHPFAQTQSLVYPFPGPIPNSLPQNIPPL	0	0	0	798144	0
INK	0	1.4982e+06	3.00687e+06	3.32325e+06	2.79047e+06
INKKIEK	0	224648	0	0	0
INNQFLPYPY	0	70058	65080	462554	1910998
INNQFLPYPYY	0	0	0	0	106638
IPIQY	0	0	0	3.24616e+06	12617296
IPPLTQTPVVVPPFLQPEVMGVSK	0	91554	861000	0	0
IQPK	0	0	0	1.83861e+06	1.61299e+06
IQPKTKVIPYVRYL	34728	0	0	0	0
ISQRYQKFALPQYLK	17656	0	0	0	0
ITVDDK	0	0	0	906736	878427
ITVDDKHYQK	0	23114	220148	0	0
IVESLSSSEESITR	0	86716	94418	0	0
KAVPYPQR	0	7706	0	32528	52740
KEAMAPK	0	65804	0	0	0
KEPMIGVNQELAYFYPELFR	0	192456	170836	0	0
KFQSEEQQQTEDELQDK	0	0	66312	246828	69516
KH	0	657437	891711	1.18407e+06	803525
KHPIKHQGLPQEVLNENLLR	0	42008	0	0	0
KHQGLPQEVLNENLLR	0	0	0	105892	0
KPW	0	0	0	0	24365.8
KVLPVPQK	0	0	0	203258	265456
KVNELSKDIGSESTEDQAMEDIK	0	0	0	120550	0
KVPQLEIVPN	0	0	0	0	171898
KVPQLEIVPNSAEER	0	48978	93114	302378	270940
KYKVPQLEIVPNSAEER	0	35084	45220	0	0
KYPVEPFTESQSL	0	0	0	0	114492
LARELEELNVPGEIVESLSSSEESITR	0	0	0	87640	0
LAYFYPELFRQFY	0	115108	0	0	0
LGY	0	0	0	343150	2866009
LGYLEQLL	0	0	0	0	131790
LGYLEQLLR	24452	3165506	442136	1343108	1732962
LHLPLP	0	0	0	0	5.00806e+06
LHLPLPL	0	0	0	0	88504
LHLPLPLLQSWM	0	20900	0	0	0
LLY	0	789414	0	12153492	37478616
LLYQEPVLGPVR	0	277622	824774	605406	14803694
LLYQEPVLGPVRGP	0	0	0	0	116062
LLYQEPVLGPVRGPFPIIV	0	717212	239434	472394	58256
LNENLLR	1213256	514076	83942	404080	430962
LNENLLRFF	47654	0	0	0	0
LNF	0	0	0	2898742	7658050
LNFL	0	0	0	0	1.37512e+06
LNFLK	0	0	1428310	5753545	3.19624e+06
LNVPGEIVESLSSSEESITR	0	0	57244	0	0
LPLPLLQSW	0	0	33330	183932	148442
LPLPLLQSWM	0	171062	0	324434	0
LPPTVMFPPQSVLSLSQSK	131962	0	0	0	0
LPQEVLNENLLR	40304	54740	63200	0	0
LQPEVMGVSK	0	0	0	0	98924
LQSW	0	1.17622e+06	0	8967643	38289596
LRFFVAPFPEVFGK	0	0	44126	0	0
LSFM	0	0	0	0	1.4724e+06
LSLSQSK	0	0	0	0	67974
LSQR	0	0	1.40735e+06	2.3001e+06	1.86891e+06
LSQSKVLPVPQKAVPYPQR	0	0	44336	0	0
LTEEEK	0	0	215724	2.68456e+06	2.73877e+06
LTEEEKNR	0	66950	62546	62710	0
LTEEEKNRLNFLK	0	832740	460746	0	0
LTEEEKNRLNFLKK	0	132884	0	0	0
LTQTPVVVPPFLQPEVMGVSK	0	147900	66956	0	0
LW	0	0	0	0	147428
LY	0	0	0	1417995	10568102
LYQEPVLGPVR	0	85670	111368	2828030	4053634
LYQEPVLGPVRGPFPIIV	0	447452	94448	95800	0
LYQGPIVLNPW	0	0	0	219242	386260
LYQGPIVLNPWDQVK	0	54136	165562	4765742	1174928
LYQGPIVLNPWDQVKR	0	928920	686312	104694	0
MAINPSK	0	0	0	25518	70906
MAIPPKK	0	0	33542	37040	0
MHQPHQPLPPTVM	0	0	0	0	94964
MHQPHQPLPPTVMFPPQSVL	0	895206	810336	3153552	3166872
MHQPHQPLPPTVMFPPQSVLSL	0	0	0	109542	0
MHQPHQPLPPTVMFPPQSVLSLSQ	0	0	0	315264	277724
MHQPHQPLPPTVMFPPQSVLSLSQSK	0	115472	422280	0	0
MIGVNQELAYFYPELFR	0	0	0	64778	0
MK	0	0	0	0	12886.8
MKPW	0	0	0	2.22859e+06	1.86233e+06
MKPWIQPKTKVIPYVRYL	19480	0	0	0	0
MPIQAFLLYQEPVLGPVRGPFPIIV	78214	0	54838	0	0
NANEEEY	0	0	0	0	65606
NAVPITPTLN	0	0	0	0	117572
NAVPITPTLNR	89872	1186136	1323772	10404738	707804
NFLK	0	0	0	323000	1.1811e+06
NIPPLTQTPVVVPPFLQPEVM	0	0	0	0	189960
NIPPLTQTPVVVPPFLQPEVMGVSK	0	0	267356	112218	259132
NK	0	0	0	25070.3	57116.7
NMAINPSK	0	40314	74582	241688	297378
NNQFLPYPYYAKPAAVR	0	0	140500	0	0
NPIGSENSEK	0	0	0	153328	134794
NQDK	0	0	0	0	888350
NQDKTEIPTIN	0	0	0	0	44186
NQDKTEIPTINTIASGEPTSTPT	0	0	0	73954	0
NQFLPYPY	0	0	0	102894	0
NR	0	0	0	0	117368
NRLNFLK	0	0	105518	0	0
NRLNFLKK	0	0	24898	0	0
PEVMGVSK	0	0	0	74004	0
PF	0	0	0	5.28097e+06	11522238
PFPEVFGK	0	0	90878	0	0
PFPK	0	1.96824e+06	6.25866e+06	12178452	11678324
PGEIVES	100110	101684	0	0	0
PGEIVESLSS	0	0	96960	0	0
PIGSENSEKTTMPLW	16244	0	0	0	0
PIQAF	0	0	0	4487509	5.51442e+06
PIQAFLLY	0	49152	148456	211618	133090
PIQAFLLYQEPVLGPVRGPFP	0	229332	532582	0	0
PIQYVLSRYPSYGLNYY	0	0	282844	0	0
PK	1.79226e+06	9537668	9291962	12228178	11614204
PLTQTPVVVPPFLQPEVMGVSK	86896	212944	0	0	0
PPEINTV	0	97684	0	0	0
PPEINTVQVT	0	77766	0	0	0
PPEINTVQVTSTA	0	304626	79516	0	0
PPK	0	0	0	0	247665
PPLTQTPVV	0	0	0	128898	0
PPLTQTPVVV	0	169180	533750	0	136822
PPLTQTPVVVP	110508	0	0	0	0
PPLTQTPVVVPPF	0	0	0	122772	69422
PPLTQTPVVVPPFLQ	56486	0	0	0	0
PPLTQTPVVVPPFLQPEVM	0	0	0	0	113442
PPLTQTPVVVPPFLQPEVMG	0	0	0	341730	0
PPLTQTPVVVPPFLQPEVMGV	0	195362	0	320436	441168
PPLTQTPVVVPPFLQPEVMGVSK	0	518894	1082502	192704	0
PPLTQTPVVVPPFLQPEVMGVSKV	0	0	112952	0	0
PPLTQTPVVVPPFLQPEVMGVSKVK	93104	0	172020	248100	0
PPLTQTPVVVPPFLQPEVMGVSKVKE	35190	0	0	0	0
PPQSVLSLSQ	420220	1650446	911594	0	0
PPQSVLSLSQSK	96696	2070722	6047500	0	0
PPTVMFPP	234634	0	0	0	0
PPTVMFPPQSVLSLSQSKVLP	0	0	0	163830	0
PQ	0	0	0	770456	804420
PQKAVPYP	92974	0	0	0	0
PQLEIVP	0	93758	0	0	0
PQLEIVPNSAE	0	449300	0	146552	0
PQLEIVPNSAEERLHSM	0	164052	343098	1959964	245976
PQLEIVPNSAEERLHSMKEGI	0	79372	0	0	0
PQNIPPLTQTPVV	0	0	0	0	128238
PQNIPPLTQTPVVVPPFLQPEVMG	0	869216	0	0	0
PQNIPPLTQTPVVVPPFLQPEVMGV	0	0	0	0	924730
PQNIPPLTQTPVVVPPFLQPEVMGVS	0	0	0	0	352380
PQNIPPLTQTPVVVPPFLQPEVMGVSK	0	0	149152	295140	0
PQYLKTV	0	0	0	0	70350
PSGAWYYVPLGT	0	283672	0	0	0
PSYGLNYY	0	0	0	531518	518668
PTINTIASGEP	0	0	0	0	156474
PTVMFPPQSVLSLSQSK	134328	150774	0	0	0
PVAL	0	0	0	0	1.44356e+06
PVLGPVRGPFPIIV	310520	0	2969274	0	0
PVPQK	0	26288806	52272952	34398908	28778738
PY	0	1.10192e+06	0	7088054	7791412
PYPQRDMPIQAFLLY	844496	4987186	73804	0	0
QAFLLYQEPVLGPVR	0	0	0	0	276210
QEK	0	0	0	0	517430
QEPVLGPVR	0	72820	90708	3616110	9433838
QEPVLGPVRGP	0	0	0	0	312680
QEPVLGPVRGPFPIIV	0	210742	107386	114676	0
QEVLNENLLRFFVAPFPEVF	0	0	0	0	130200
QF	0	0	0	568252	2.35042e+06
QFLPYPYYAKPAAVR	0	0	44922	0	0
QFY	0	2.73287e+06	1.65154e+06	16339047	31193836
QFYQLDAYPSGAW	0	0	0	303728	102774
QFYQLDAYPSGAWY	0	104904	448620	114188	0
QFYQLDAYPSGAWYYVPLGTQY	0	0	92116	62734	0
QFYQLDAYPSGAWYYVPLGTQYT	0	456598	609782	0	0
QGPIVLNPW	0	0	0	0	139592
QGPIVLNPWDQVK	0	0	0	404196	1003376
QGPIVLNPWDQVKR	0	150172	0	0	0
QLDAYPSGAW	0	0	0	836532	466724
QLDAYPSGAWY	0	300186	53958	1215156	397432
QLDAYPSGAWYYVPLGTQYTDAPSFSDIPNPIGSENSEK	0	0	34642	0	0
QNIPPLTQTPVVVPPFLQPEVMGVSK	0	0	0	0	290958
QPEVMGVSK	0	417260	81100	1110726	231706
QPHQPLPPTVMFPPQSVLSLSQSK	94144	167376	147690	0	0
QPKTKVIPYVRYL	25074	0	0	0	0
QPLPPTVMFPPQSVL	0	0	0	0	72596
QPLPPTVMFPPQSVLSLSQSK	66710	0	0	0	0
QQKEPMIGVNQELAYFYPELFR	0	140174	208054	0	0
QQKPVAL	0	0	0	0	251412
QQKPVALINNQFLPYPY	0	0	0	1025076	426408
QR	0	430307	679612	729553	588508
QSKVLPVPQK	0	0	0	66834	0
QSLTLTDVENL	0	0	0	0	175828
QSLTLTDVENLHLPLPL	0	0	0	0	232316
QSLTLTDVENLHLPLPLLQSW	0	226012	504364	1631874	951364
QTPVVVPPFLQPEVMGVSK	0	179284	0	0	0
QVLSNTVPAK	0	11260	195836	336682	424812
QW	0	0	0	0	47520.4
QY	0	0	0	0	461975
RELEELN	0	50334	80020	0	0
RELEELNVPG	26950	40024	66842	0	0
RELEELNVPGEI	0	0	151844	0	0
RELEELNVPGEIVE	28566	66122	48462	0	0
RELEELNVPGEIVES	22696	0	0	0	0
RELEELNVPGEIVESL	30322	46634	47982	0	0
RELEELNVPGEIVESLSSSEES	0	133890	114796	174742	0
RELEELNVPGEIVESLSSSEESI	20606	0	0	0	0
RELEELNVPGEIVESLSSSEESITR	0	55848	60164	68020	0
RFFVAPFPEVF	0	0	0	18844	0
RFFVAPFPEVFGK	0	98758	116882	127960	0
RGPFPIIV	24612	0	0	44640	76200
RNAVPITPTLNR	11218	67864	163056	51084	141036
RPKHPIK	262090	0	0	0	0
RPKHPIKHQGL	653612	0	0	0	0
RPKHPIKHQGLPQEVLNENLLR	202540	0	0	0	0
RQFYQLDAYPSGAWY	0	152324	0	0	0
SDK	0	0	0	2.21377e+06	1868285
SEKTTMPLW	44566	0	0	0	0
SFMAIPPKK	0	0	50274	0	0
SI/L	0	48342.3	0	496169	1786471
SK	0	761515	0	1.82852e+06	4362742
SKDIGSESTEDQAMEDIK	0	0	67266	188246	72402
SKVLPVPQK	0	0	32514	0	234556
SLPQNIPPLTQTPVVVPPFLQPEVM	0	0	0	0	484980
SLPQNIPPLTQTPVVVPPFLQPEVMGVSK	0	0	349770	863432	1540772
SLSQSK	0	0	0	7844690	5.78219e+06
SLSQSKVLPVPQK	26956	121856	0	0	225458
SLTLTDVENLHLPLPL	0	0	0	0	125008
SLTLTDVENLHLPLPLLQSW	0	49200	0	81082	81734
SLVYPFPGPIPN	0	0	0	154480	303318
SNTVPAK	0	26274	56610	65018	310750
SPAQIL	0	0	0	746276	3.56765e+06
SPAQILQW	0	35146	190922	2426986	2793500
SPAQILQWQ	0	0	30464	0	0
SPAQILQWQVL	0	471432	139964	625010	149960
SPAQILQWQVLSNTVPAK	0	655136	1741192	239038	75258
SQSK	0	2.28353e+06	0	3.63131e+06	2.81499e+06
SSEESITR	0	0	137570	0	0
SVLSLSQSK	0	0	22320	0	0
SWMHQPHQPLPPTVMFPPQSVLSLSQSK	0	0	107598	0	0
TCLVAVALARPKHPIKHQGLPQEVLNENLLR	0	0	0	221904	0
TDAPSFSDIPNPI	0	0	0	0	127812
TDAPSFSDIPNPIGSENSEK	0	224518	405036	3038148	6771474
TDAPSFSDIPNPIGSENSEKTTMPLW	0	211294	437380	0	0
TDVENLHLPLPL	0	0	0	0	157436
TDVENLHLPLPLLQSW	0	0	0	89400	156724
TEDELQDKIHPF	0	630080	0	492022	0
TEIPTIN	0	0	0	0	63836
TEIPTINTIASGEPTSTPTT	0	0	0	0	280640
TEIPTINTIASGEPTSTPTTEAVESTV	0	0	0	274514	70496
TESQSLTLTDVENL	0	0	0	0	235660
TESQSLTLTDVENLHLPLPL	0	0	0	0	455562
TESQSLTLTDVENLHLPLPLLQSW	0	86872	84048	53470	84692
TEVFTKK	259478	136888	42202	0	0
TF	0	0	0	0	186741
TK	127981	834230	1.09522e+06	7.79855e+06	6771125
TKVIPYVR	230536	940556	219144	0	0
TKVIPYVRYL	951660	0	0	0	0
TLTDVENL	0	0	0	0	1033590
TLTDVENLH	0	0	0	0	46234
TLTDVENLHLPLPL	0	0	0	195008	2734478
TLTDVENLHLPLPLLQ	0	0	0	0	528870
TLTDVENLHLPLPLLQSW	0	76466	49738	3579996	6471606
TLTDVENLHLPLPLLQSWM	0	0	0	76834	184756
TLTDVENLHLPLPLLQSWMHQP	0	0	0	0	92198
TPVVVPPFLQPEVMGVSK	0	94142	0	0	0
TQTPVVVPPFLQPEVMGVSK	0	0	294060	879854	0
TTMPLW	3.61677e+06	36542596	124572480	161690144	150407424
TVDMESTEVF	0	0	0	0	146658
TVDMESTEVFTK	0	0	106288	104300	0
TVDMESTEVFTKK	0	44988	112736	0	0
TVMFPPQSVLSLSQSK	0	223478	0	0	0
TVQVTSTAV	0	0	0	0	48826
TVY	0	5.55391e+06	2.74585e+06	13082525	13153434
TVYQHQK	150536	452252	56834	0	0
VAPFPEVF	0	79150	0	620398	352930
VAPFPEVFGK	43172	165154	1397596	220966	2354444
VAPFPEVFGKEK	41552	334500	54948	0	0
VAVALAR	0	0	0	59736	0
VESLSSSEESITRINK	242452	0	0	0	0
VI/L	0	0	0	426327	3237747
VIPY	0	8329946	7186955	49881744	53374852
VIPYVRYL	3586538	115166	0	0	0
VKEAMAPK	307894	1347890	132708	17492	0
VKEAMAPKHK	94768	0	0	0	0
VLGPVRGPFPIIV	0	58722	0	0	0
VLNENLLRFFVAPFPEVFGK	0	0	90536	0	0
VLPVPQ	0	1.38943e+06	479285	885750	2.11617e+06
VLPVPQK	84362	340436	514462	750340	281016
VLPVPQKAVPYPQR	199914	400644	0	0	0
VLSLSQSK	0	0	0	0	68714
VLSNTVPAKSCQAQPTTM	0	0	0	0	195144
VLSRYPSY	0	36688	0	0	0
VLSRYPSYGLNY	0	107578	120848	0	0
VMFPPQSVLSLSQSK	59732	0	0	0	0
VNEL	0	0	0	454629	1.00636e+06
VNELSK	0	0	96058.7	2.19708e+06	2.70664e+06
VPLGTQY	0	0	0	222402	436930
VPLGTQYTDAPSFSDIPNPIGSENSEK	0	0	112946	515892	202104
VPQLEIVPN	0	0	0	0	255354
VPQLEIVPNS	0	72240	46556	0	0
VPQLEIVPNSAEER	0	0	181172	664500	1049080
VR	0	1.81539e+06	2.48884e+06	3277598	3.42307e+06
VY	0	0	0	0	223882
VYPFPGPIPN	0	0	0	99254	455368
VYPFPGPIPNSLPQNIPPLTQTPVVVPPFLQPEVMGVSK	0	0	0	88690	0
YAK	0	0	0	0	445612
YAKPAAVR	0	49076	30020	108630	45580
YFYPELF	0	0	0	0	104902
YH	0	0	0	260925	2.414e+06
YI/L	7.98105e+06	28215918	33481864	31769026	28757612
YIPIQY	0	3.7935e+06	7250351	23693486	28945940
YIPIQYVLSR	0	60190	646252	0	0
YK	0	57801.2	444432	1.52006e+06	2509363
YKVPQLEIVPN	0	0	117336	117362	0
YKVPQLEIVPNS	0	0	103966	0	0
YKVPQLEIVPNSAEER	0	417404	1341230	589278	0
YKVPQLEIVPNSAEERLHSMKEGI	0	297502	0	0	0
YLGY	0	1.58179e+06	690546	2.14486e+06	3.62615e+06
YLGYLEQLL	0	119690	0	0	176432
YLGYLEQLLR	436740	1107498	2821768	3193916	1617198
YLGYLEQLLRL	0	111942	101584	0	0
YLGYLEQLLRLK	53134	145246	0	0	0
YLGYLEQLLRLKK	52184	0	0	0	0
YLK	0	0	0	0	100273
YLY	0	0	0	0	849403
YLYQGPIVLNPWDQVK	0	0	0	0	225440
YPELF	0	0	0	6.91079e+06	43180768
YPSY	0	0	0	1.0188e+06	6618874
YPSYGLN	0	0	0	34348	199926
YPSYGLNY	0	0	0	618054	826678
YPSYGLNYY	0	0	0	233784	259340
YPVEPF	0	1.27608e+06	896056	6754463	19653580
YPVEPFTESQ	0	34202	0	0	197212
YPVEPFTESQSL	0	101314	126542	1397720	2891714
YPVEPFTESQSLT	0	0	0	144508	115126
YPVEPFTESQSLTL	0	0	0	0	123314
YPVEPFTESQSLTLTDVENL	0	0	0	223574	486028
YPVEPFTESQSLTLTDVENLH	0	0	0	111136	58354
YPVEPFTESQSLTLTDVENLHLPLPL	0	122538	68800	2502616	212688
YPVEPFTESQSLTLTDVENLHLPLPLLQ	0	0	67338	217026	148174
YPVEPFTESQSLTLTDVENLHLPLPLLQSW	0	1323614	818080	13944258	2928782
YPVEPFTESQSLTLTDVENLHLPLPLLQSWM	0	0	87000	0	0
YQEPVLGPVR	0	0	0	739964	2226680
YQK	0	621669	1.83591e+06	2241145	2.20951e+06
YQKFALPQYLK	89974	167612	106428	0	0
YQKFPQYLQY	0	0	0	84906	0
YQKFPQYLQYLYQGPIVLNPWDQVKR	0	0	50594	0	0
YQQKPVAL	0	36282	0	716498	78390
YQQKPVALINNQFLPYPY	0	0	91284	361754	124406
YR	0	0	0	632438	635069
YTDAPSFSDIPNPIGSENSEK	0	65862	0	0	0
YVPLGTQY	0	120756	0	244184	5882804
YVPLGTQYTDA	0	198078	0	0	0
YVPLGTQYTDAPSFSDIPNPIGSENSEK	0	420656	1026264	2825418	248676
YY	0	0	0	0	3699342
YYAKPAAVR	0	0	251524	0	0
YYVPLGTQY	0	0	0	213144	792260
YYVPLGTQYTDAPSFSDIPNPIGSENSEK	0	0	167648	649054	0

## Sheet: Peptide identification_alcalase
sequence	peak area
	DH=3%	DH=5.5%	DH=8%	DH=10.5%	DH=13%
AF	0	186963	1.28841e+06	3.43338e+06	5401201
AFL	0	1.36136e+06	1.77716e+06	1541903	1.50348e+06
AIPPKKNQDKTEIPTIN	0	0	0	289602	0
ALPQ	0	0	292076	1.15322e+06	1.99705e+06
ALPQYL	0	0	0	3.61236e+06	7557983
ALPQYLK	0	0	71572	161518	253190
ALPQYLKT	0	0	121274	155984	284912
ALPQYLKTVYQHQ	0	0	165230	293706	202712
ALT	0	567991	336568	1.37228e+06	2.208e+06
AMAPKHKEMPFPKYPVEPF	0	0	0	0	185036
AMEDIKQM	0	0	296716	489366	504450
ANEEE	0	648252	4.02922e+06	9032775	11625974
APK	0	8.30163e+06	21489886	35711376	38745468
AQ	0	372931	474680	678249	954362
AQTQ	0	0	969371	3.31542e+06	9265815
AQTQSLVYPFPGPIPN	0	107754	0	0	0
ARHPHPHLSFM	0	0	0	489794	0
ATEEVKIT	0	0	44672	144934	71560
ATLEDSPEVIESPPEIN	0	0	0	206336	0
AV	210074	1.41737e+06	1.51906e+06	1.77236e+06	1.76148e+06
AVE	0	0	253178	680229	1.39167e+06
AVEST	0	2.68404e+06	5.25577e+06	4.36793e+06	1865182
AVESTVA	0	0	0	337820	0
AVESTVATL	0	0	0	77264	0
AVESTVATLEDSPEV	0	0	0	139218	0
AVESTVATLEDSPEVIES	0	0	0	129914	0
AVPITPT	0	0	97944	370726	300430
AVPITPTL	0	0	0	0	105176
AVPITPTLN	0	0	0	257482	436298
AVPITPTLNRE	0	0	599600	1187534	3320204
AVPYPQRDMPIQ	0	0	0	64850	251246
AVPYPQRDMPIQAF	0	122652	213310	415092	676362
AVRSPAQIL	0	0	0	1596654	0
DAYPSGA	0	0	69330	115006	151224
DAYPSGAW	0	96558	315650	408518	336264
DAYPSGAWYYVPL	0	481322	392744	264392	180056
DMPIQAF	0	85458	0	0	0
DMPIQAFLLYQEPVLGPVRGPFPIIV	0	116898	0	0	0
DQAMEDIKQM	0	141676	422464	124848	0
DVENL	0	0	0	887060	1.25378e+06
DVENLHLPLPL	0	0	56192	55048	31722
DVENLHLPLPLLQ	0	238066	678948	484248	194904
DVPSERYL	0	0	312632	266230	1119842
DVPSERYLGY	0	130372	502084	3186146	1755052
DVPSERYLGYL	0	0	928970	1021736	0
DVPSERYLGYLE	0	175228	1761866	2301618	995994
DVPSERYLGYLEQ	0	0	140880	550262	0
DVPSERYLGYLEQL	0	163112	749416	478000	0
DVPSERYLGYLEQLLR	0	98144	69668	0	0
DVPSERYLGYLEQLLRL	0	0	52314	100208	0
DVPSERYLGYLEQLLRLK	0	187558	337184	666660	160470
EAE	0	23117.5	123943	228329	266597
EAMAPKHKEM	0	0	0	1124086	742082
EAMAPKHKEMPFPKYPVEPF	0	0	0	276224	287586
EDELQDKIHPF	0	0	0	158024	0
EEI/L	0	624211	5.55144e+06	13085133	15927318
EELNVPGEIVESLSSSEESITRIN	0	0	310858	116756	0
EGIHAQQ	0	33744	0	0	0
EI/L	0	96216.5	448189	867061	1.9415e+06
EK	0	0	673837	1.32394e+06	1.68478e+06
ELAY	0	0	0	227058	280379
ELAYFYPE	0	0	262180	312706	263978
ELAYFYPELFRQFYQL	0	0	60066	61994	0
ELQDKIHPF	0	114466	59218	0	0
EMPFPKYPVEPF	0	186414	175130	1451386	1549772
EMPFPKYPVEPFTE	0	0	0	112340	0
ENLHLPLPL	0	0	0	0	211000
EPMIGVNQELAYFYPELF	0	0	0	34690	0
EQL	0	0	148401	432327	574157
EQLL	0	0	1.08743e+06	3838041	7.0024e+06
EQLLRLK	0	80688	400274	595376	645886
ERLHSMKEGIHAQ	0	0	40698	0	0
ESTEDQAMEDIKQM	0	1936580	294264	0	0
EVI/L	0	728506	6.30115e+06	20158024	30867544
EVLNE	0	0	1.13535e+06	2.97561e+06	4.425e+06
EVLNENLLR	0	127910	444734	449796	0
EVLNENLLRFF	0	833148	500686	473458	0
FF	0	0	334623	1032814	1.641e+06
FFVAPFPE	0	364792	226744	908360	246882
FFVAPFPEVF	0	265198	278824	564344	86040
FFVAPFPEVFGK	0	171052	159060	51770	0
FFVAPFPEVFGKEK	0	0	38178	0	0
FFVAPFPEVFGKEKVNE	0	369988	93802	0	0
FFVAPFPEVFGKEKVNEL	0	1074074	463072	0	0
FM	0	109072	714844	2.79593e+06	7030664
FPPQSVL	0	0	0	0	94756
FRQFYQL	0	0	0	119412	142048
FVAPFPE	0	189108	183262	742426	461198
FVAPFPEVF	0	109606	508472	541554	248872
FVAPFPEVFGK	0	80152	93790	0	0
FVAPFPEVFGKEKVNE	0	187694	123790	0	0
FVAPFPEVFGKEKVNEL	0	513728	497852	0	0
FY	0	357029	3.81241e+06	13415446	25467770
FYPE	0	21481202	31048350	26951272	16297801
FYPELF	0	0	0	1969346	2233473
FYPELFRQ	0	0	90592	125266	0
FYPELFRQF	0	0	0	114400	253260
FYQL	0	0	3.19798e+06	13585337	25488384
GAW	0	0	0	1.31398e+06	3882607
GAWYYVPL	0	72104	143246	208224	663248
GAWYYVPLGTQY	0	54342	0	0	0
GKEKVNE	0	0	138658	131834	164940
GKEKVNEL	0	107476	765114	914676	783174
GKEKVNELSK	0	0	188900	0	0
GKEKVNELSKDIGSESTEDQ	0	0	310864	0	0
GLPQ	122579	2.80003e+06	6722142	12977483	20175556
GLPQE	0	563846	2.00539e+06	3.70638e+06	3.91299e+06
GLPQEVL	0	193106	1393400	2181772	1125264
GLPQEVLNE	0	176642	2237864	3488004	987062
GLPQEVLNEN	0	0	471392	264010	0
GLPQEVLNENLL	0	376128	1578764	718498	0
GLPQEVLNENLLR	0	2074910	5861390	2501828	176678
GLPQEVLNENLLRF	0	971718	743494	65812	0
GLPQEVLNENLLRFF	0	9215760	2725162	732694	85968
GLPQEVLNENLLRFFVAPFPE	0	172546	0	0	0
GLPQEVLNENLLRFFVAPFPEVF	0	102736	0	0	0
GPFPIIV	0	0	0	0	40984
GPIVLNPWDQVKRN	0	0	0	160494	358782
GPVRGPFPIIV	0	0	0	44856	36752
GSESTEDQAMEDIKQM	0	227892	238090	108068	0
GTQ	0	0	0	1.72665e+06	2.97936e+06
GTQY	0	0	0	720830	1.47199e+06
GTQYTDAPSF	0	2025924	1570080	1326224	1082480
GTQYTDAPSFSDIPN	0	0	281824	185940	209560
GTQYTDAPSFSDIPNPIGSE	0	0	99496	159020	184788
GTQYTDAPSFSDIPNPIGSEN	0	0	184848	337390	137914
GTQYTDAPSFSDIPNPIGSENSE	0	131048	377132	442592	1200648
GTQYTDAPSFSDIPNPIGSENSEKTTMPLW	0	3259732	5805084	5265576	2980038
GVLNENLLRFF	54324	0	0	0	0
GVS	0	0	0	52173.7	21474.7
GYL	0	0	0	438872	920319
GYLEQL	0	0	0	1.05184e+06	2.6141e+06
GYLEQLLRLK	0	0	126340	304156	258468
HIQ	0	0	310227	470535	611743
HIQKE	0	3639630	14715102	25097710	31151210
HIQKEDVP	0	120294	342064	282422	0
HIQKEDVPSE	0	0	128528	167688	0
HIQKEDVPSERYL	0	0	43230	87952	0
HIQKEDVPSERYLGY	0	40574	287700	136482	0
HIQKEDVPSERYLGYL	0	87772	342156	0	0
HIQKEDVPSERYLGYLE	0	0	265300	144712	0
HKEMPFPKYPVEPF	0	200210	537666	997296	3512360
HKEMPFPKYPVEPFTE	0	0	173948	225410	0
HKEMPFPKYPVEPFTESQ	0	211016	246828	201278	0
HKEMPFPKYPVEPFTESQSL	0	97596	0	0	0
HLPLPLL	0	0	241936	137904	793472
HLPLPLLQ	0	198312	1279480	661124	45992
HLPLPLLQS	0	0	121958	143486	132524
HLPLPLLQSW	0	208578	200812	275022	80842
HQPHQPLPPTVMFPPQ	0	0	0	0	134394
HQPHQPLPPTVMFPPQSVL	0	0	0	205764	178792
HSM	0	0	765504	1.51076e+06	2.37357e+06
I/LE-1	0	2.945e+06	5036290	4598714	3.54657e+06
I/LH	0	1.32471e+06	8514202	28695966	52930148
I/LQ	0	0	913576	2421968	3.86549e+06
I/LR-2	0	0	66104.7	21702.3	125526
I/LR-3	0	0	179351	235620	0
I/LR-4	0	0	13623.6	235620	672423
IAKYIPIQYVL	0	0	0	30154	0
IHPF	0	0	0	17077.1	14338.9
IHPFAQTQ	0	37928	21078	0	0
IL/LI/II/LL	0	0	0	511504	542843
INNQFLPYPY	0	0	0	125526	0
INQFYQKFPQ	0	0	0	0	84396
INQFYQKFPQYL	0	0	0	0	219644
INTVQVT	0	0	0	106186	0
IPPLTQTPVVVPPFLQPE	0	0	25112	65928	281042
IPPLTQTPVVVPPFLQPEVM	0	0	99962	305392	281690
IPPLTQTPVVVPPFLQPEVMGVS	0	0	30332	0	0
IVPN	0	270136	1.36311e+06	2.05937e+06	1.16569e+06
IVPNSAEERLHSM	0	170348	220140	0	0
KAVPYPQ	0	0	0	82930	115802
KAVPYPQRDMPIQ	0	0	0	150326	519010
KAVPYPQRDMPIQAF	0	103244	217490	407784	629546
KDIGSESTEDQAMEDIKQM	0	150878	0	0	0
KEAMAPK	0	0	0	0	43202
KEDVPSE	0	0	0	124968	260438
KEDVPSERYLG	0	72142	0	0	0
KEDVPSERYLGY	0	0	85270	230364	0
KEDVPSERYLGYL	0	0	104208	211944	0
KEDVPSERYLGYLE	0	0	0	165974	0
KEGIHAQ	44158	1006998	1618818	1025424	784876
KEGIHAQQKEPMIGVN	0	169326	0	0	0
KEPMIGVN	0	0	0	0	472230
KEPMIGVNQ	0	0	0	0	88974
KF	0	3.86921e+06	7.64076e+06	11141265	13587732
KFQSEEQQQTEDELQDKIHPF	0	91364	0	0	0
KHPIKHQ	0	44394	42126	16944	29834
KNRLNFL	0	0	0	126762	500580
KTTMPLW	0	291344	766504	809978	1167170
KVIPYVRY	0	0	0	0	21240
KVKEAMAPK	0	20150	31916	29488	0
KVLPVPQ	0	0	0	162616	531518
KVLPVPQKAVPYPQ	0	0	0	0	213366
KVPQLE	0	0	0	1.70971e+06	2.2011e+06
KVPQLEIVPN	0	0	191776	548542	404028
KYKVPQL	0	0	0	0	184660
KYKVPQLE	0	64948	178868	331902	1227094
KYKVPQLEIVPN	0	70946	168056	852054	523484
LAY	0	0	0	1.29023e+06	2.86335e+06
LAYFYPE	0	0	173810	212408	241400
LAYFYPELFRQ	0	0	103578	97458	50890
LAYFYPELFRQF	0	0	0	44760	0
LCSTFCKEVVRN	0	0	0	139248	120168
LDAYPSGAW	0	107512	0	0	0
LEEL	0	561180	3.79062e+06	8752684	11740091
LEQ	0	195425	849804	1.21025e+06	1.22741e+06
LEQL	0	0	1.58201e+06	6125112	12088857
LEQLLRL	0	0	161758	331522	253840
LEQLLRLK	0	64720	492082	878420	707090
LFRQF	0	0	1.54297e+06	5.61891e+06	10455778
LFRQFYQL	0	387750	852976	618434	474166
LGPVRGPFPIIV	0	0	0	0	102918
LGTL	0	756700	5.18522e+06	9866499	11601969
LHLPLPL	0	0	0	65654	469404
LHLPLPLL	0	0	117058	125332	0
LHLPLPLLQ	0	0	0	71624	329730
LLY	0	5787268	10393072	9463813	5995373
LLYQEPVLGPVRGPFPII	0	73610	166718	137784	90430
LLYQEPVLGPVRGPFPIIV	0	5270714	2700632	2725944	9558744
LNEINQFYQKFPQYL	0	0	0	64236	0
LNENLLR	18714	0	0	0	0
LNENLLRFF	351886	94086	0	0	0
LPLPLLQ	0	0	0	0	1043178
LPQEVLNENLLRFF	0	42852	0	0	0
LQDKIHPF	0	72060	176648	401508	731386
LQSW	0	0	271979	868382	1.56933e+06
LSKDIGSESTEDQAMEDIKQM	0	218714	109856	0	0
LTEEEKNRLNFL	0	0	0	0	218922
LVYPFPGPIPN	0	0	60898	56154	113626
LW	0	0	110884	516007	967383
LY	0	0	0	821681	1.33644e+06
LYQEPVLGPVRGPFPIIV	0	116016	724288	1346594	933810
LYQGPIVLNPWDQVKR	0	0	137824	206216	222326
LYQGPIVLNPWDQVKRN	0	0	1077086	2271680	2221792
MAPKHKEMPFPKYPVEPF	0	0	182338	289634	337256
MEDIKQM	331868	418110	0	0	0
MHQPHQPLPPTVM	0	0	0	0	205688
MHQPHQPLPPTVMFPPQ	0	0	108252	546376	983938
MHQPHQPLPPTVMFPPQSVL	0	266058	1397346	1503514	1130390
MHQPHQPLPPTVMFPPQSVLSL	0	307966	157802	97636	66578
MPFPKYPVEPF	0	0	349102	0	0
MPIQAFLLYQEPVLGPVRGPFPIIV	0	0	103762	142974	104210
NE	0	0	297084	1110753	2.07136e+06
NEEE	0	1082098	2.94998e+06	2.53115e+06	1.22382e+06
NEINQFYQKFPQYL	0	0	210038	436656	158698
NEINQFYQKFPQYLQY	0	0	138916	131228	88102
NEINQFYQKFPQYLQYL	0	0	0	103696	0
NENLLRF	0	56788	182442	348506	280090
NENLLRFF	0	875900	2746432	1041862	708944
NI/L	0	4.71496e+06	9532478	16851350	26484368
NIPPLTQTPVVVPPFLQPE	0	0	109858	414630	701204
NIPPLTQTPVVVPPFLQPEVM	0	84572	573384	1071284	1422254
NLHLPLPL	0	0	0	82146	132234
NLHLPLPLL	0	0	0	0	55860
NLHLPLPLLQ	0	89846	178600	765474	298960
NLL	0	280759	786248	1.64954e+06	2.63838e+06
NLLRFFVAPFPE	0	28938	0	0	0
NPWDQVKRN	0	0	0	0	65342
NQFLPYPY	0	0	0	246842	0
NQFLPYPYYAKPA	0	0	0	438946	0
NSEKTTMPLW	0	0	0	232086	1066872
NVPGEIVE	0	0	147680	427000	649174
NVPGEIVESL	0	183372	525256	398294	180156
NYYQQKPVAL	0	0	0	104616	0
PEQ	0	0	994687	3.34334e+06	6252789
PEVFGKEKVNELSKDIGSE	0	99844	0	0	0
PGEIVESLS	0	311954	0	0	0
PGEIVESLSSSEESI	0	175982	145670	281228	0
PGEIVESLSSSEESITR	0	0	125968	0	0
PGEIVESLSSSEESITRI	0	100732	0	0	0
PIKHQGLPQEVLNENLLRFF	0	762432	162332	0	0
PK	0	193725	1.42812e+06	4620833	9684788
PLLQ	0	875436	4.64228e+06	11388406	16282115
PMIGVNQEL	0	125294	0	0	0
PN	270491	11667931	25502980	35876636	40786680
PPFLQPEVMGVSK	0	200572	0	0	0
PPFLQPEVMGVSKVKEAMA	0	329360	109290	161814	0
PPFLQPEVMGVSKVKEAMAP	0	524018	0	54540	0
PPFLQPEVMGVSKVKEAMAPK	0	0	44964	71224	0
PPFLQPEVMGVSKVKEAMAPKHK	0	108468	0	0	0
PPFLQPEVMGVSKVKEAMAPKHKEMPFPKYPVEPFT	0	0	112260	0	0
PPLTQTPVVV	0	121246	0	0	0
PPLTQTPVVVPPFLQPEVM	0	0	99218	127674	156526
PPLTQTPVVVPPFLQPEVMG	0	313632	500968	95252	0
PPLTQTPVVVPPFLQPEVMGVS	0	0	0	69530	60862
PPLTQTPVVVPPFLQPEVMGVSKV	0	0	0	291110	0
PPQSVLSLSQSKV	0	80134	0	0	0
PQEVLNENLLRF	0	0	90218	0	0
PQEVLNENLLRFFVA	0	6665082	296782	163596	57604
PQNIPPLTQTPVV	0	0	0	176254	159220
PQNIPPLTQTPVVVPPFLQPEVMGV	0	170914	197452	0	250922
PQNIPPLTQTPVVVPPFLQPEVMGVS	0	0	0	0	196432
PVVVPPFLQPE	0	0	135350	79576	207990
QAMEDIK	0	57040	96190	0	0
QAMEDIKQM	0	420714	205274	0	0
QAQPTTM	0	0	0	98384	0
QDKTEIPTIN	0	0	0	67620	0
QE	0	0	0	599472	734937
QELAYFYPE	0	173510	631940	1013568	743390
QELAYFYPELF	0	0	0	66594	23132
QELAYFYPELFRQ	0	113536	73000	0	0
QELAYFYPELFRQF	0	0	61578	0	0
QELAYFYPELFRQFYQL	0	69498	110048	0	0
QEPVLGP	0	0	140290	491548	0
QEPVLGPVR	0	45140	473998	3576628	216434
QEPVLGPVRGPFPII	0	0	0	73888	100258
QEPVLGPVRGPFPIIV	0	777446	742976	3814792	4151286
QGPIVLNPWDQVKRN	0	0	159974	527408	797984
QGVLNENLLRFF	225674	0	0	0	0
QI/L	0	137417	1.04584e+06	4985853	12708753
QKEPMIGV	0	0	85932	149190	159820
QKEPMIGVN	0	625702	1798496	1354572	4416338
QKEPMIGVNQ	0	487568	1237526	1005786	616686
QKEPMIGVNQE	0	209982	413790	254614	0
QKEPMIGVNQEL	0	142100	0	0	0
QKEPMIGVNQELAY	0	173848	0	0	0
QKEPMIGVNQELAYFYPE	0	182752	312892	103550	0
QKEPMIGVNQELAYFYPELFRQ	0	230698	143384	0	0
QKEPMIGVNQELAYFYPELFRQF	0	81732	70966	0	0
QKEPMIGVNQELAYFYPELFRQFYQL	0	0	158820	93672	0
QM	0	0	143743	346436	751881
QPEVMGV	0	213828	273884	364398	962394
QPEVMGVSKVKEAMA	0	0	83148	0	0
QQKPVAL	0	0	0	183796	0
QQKPVALIN	0	0	0	118646	0
QQQTEDELQDKIHPF	0	83982	208138	564848	1374168
QSEEQQQTEDELQDKIHPF	0	649828	825044	467912	258406
QSKVLPVPQ	0	0	0	0	115930
QSL	0	0	0	346701	871154
QSLTLTDVENL	0	0	77534	0	0
QSLTLTDVENLHLPLPLLQ	0	97784	0	0	0
QSLVYPFPGPIPN	0	0	65104	49376	81650
QTEDELQDKIHPF	0	717694	1286296	499172	98712
QTPVVVPPFLQPE	0	0	0	0	69044
QTQ	0	0	497702	321049	0
QVL	0	0	656901	3.57612e+06	10147723
QWQVL	0	24666798	40230140	61964424	86678888
QY	0	0	371023	659592	1.00256e+06
QYLYQGPIVLNPWDQVKRN	0	0	126216	358982	152252
QYTDAPSFSDIPNPIGSENSEKTTMPLW	0	0	154190	220596	206892
RDMPIQAF	0	0	448120	943334	582410
RDMPIQAFLLYQEPVLGPVRGPFPIIV	0	194058	0	0	0
RELEEL	0	19234166	34364868	31776720	24511188
RELEELNVP	0	87024	0	0	0
RELEELNVPGE	0	137230	0	0	0
RELEELNVPGEIVE	0	151614	0	0	0
RELEELNVPGEIVES	0	116524	0	0	0
RELEELNVPGEIVESL	0	516252	0	0	0
RELEELNVPGEIVESLSSSE	0	67064	0	0	0
RFF	0	0	0	1051454	1.22162e+06
RFFVAPFPE	0	0	0	0	271908
RFFVAPFPEVF	0	0	65686	53506	0
RLH	0	1.09292e+06	6552368	17673762	26198812
RPKHPIKHQ	0	37104	134776	95072	0
RYL	0	1.24831e+06	2.62034e+06	2538825	1.9151e+06
RYLGYLE	0	0	579314	1586254	1990770
RYLGYLEQ	0	0	116232	336892	187988
RYLGYLEQL	0	87198	336406	248680	0
RYLGYLEQLLRLK	0	0	54678	72744	0
RYPSYGLN	0	0	0	211750	0
SAEE	0	641049	1.70581e+06	2.62974e+06	2.82896e+06
SAEERLHSM	0	44796	178222	0	0
SEKTTMPLW	0	244670	821166	201678	391478
SESTEDQAMEDIKQM	0	123028	0	0	0
SGEPTSTPTTEAVE	0	0	0	79416	0
SI/L	0	0	27452.4	428903	0
SK	0	0	0	853491	962461
SKDIGSESTEDQAMEDIKQM	0	361382	0	0	0
SKVLPVPQ	0	0	0	148262	606840
SKVLPVPQKAVPYPQ	0	0	0	74054	196090
SLPQ	0	285947	2413321	14399256	29460562
SLPQNIPPLTQTPVVVPPF	0	0	0	0	43958
SLPQNIPPLTQTPVVVPPFLQPE	0	0	850626	436446	1111158
SLPQNIPPLTQTPVVVPPFLQPEVM	0	101794	599118	1311138	571366
SLPQNIPPLTQTPVVVPPFLQPEVMGVS	0	0	660288	0	0
SLSQSKVLPVPQ	0	54042	113420	300828	157764
SLSQSKVLPVPQKAVPYPQRDMPIQAF	0	0	219772	132984	0
SLTL	0	2207368	5705806	10252373	13050784
SLTLT	0	530103	1.33599e+06	2.20289e+06	2377382
SLTLTDVENL	0	881120	1131196	431784	178470
SLTLTDVENLHLPLPL	0	0	77528	61226	0
SLTLTDVENLHLPLPLLQ	0	1200446	669626	386392	236790
SLTLTDVENLHLPLPLLQSW	0	73994	61134	29778	29818
SLVYPFPGPIPN	0	316374	81130	909892	184566
SLVYPFPGPIPNSL	0	0	0	54990	0
SLVYPFPGPIPNSLPQ	0	111198	89106	72558	0
SLVYPFPGPIPNSLPQNIPPLTQTPVVVPPFLQPEVMGVS	0	377494	111382	0	0
SM	0	0	0	159114	177040
SNTVPAK	0	0	0	17366	0
SQSKVLPVPQ	0	127616	101764	335206	942672
SQSKVLPVPQK	0	19630	0	0	0
SQSKVLPVPQKAVPYPQ	0	0	165708	0	717066
SQSKVLPVPQKAVPYPQRDMPIQ	0	0	0	0	113048
SQSKVLPVPQKAVPYPQRDMPIQAF	0	376964	469240	566288	519962
SQSL	0	4.35704e+06	10453955	16025354	17636948
SQSLTLTDVENL	0	185964	221956	155462	107698
SQSLTLTDVENLHLPLPLLQ	0	317652	149654	89500	64714
SQSLTLTDVENLHLPLPLLQSW	0	59928	0	0	0
SRYPSYGLN	0	0	0	121376	0
ST	0	569780	404531	636031	636377
STAV	0	0	201074	8.10465e+06	0
STEVFTK	0	0	178394	0	0
SVL	0	582372	0	13415446	0
SVLSL	0	0	0	729028	1.66198e+06
SW	0	0	0	362045	414701
SWMHQPHQPLPPTVMFPPQ	0	0	113336	245744	381140
SWMHQPHQPLPPTVMFPPQSVL	0	612190	1650512	2970168	1448158
SWMHQPHQPLPPTVMFPPQSVLSL	0	546862	420564	173358	85792
TAV	0	13080.4	0	81288.3	191849
TDAPSFSDIPNPIGSE	0	0	0	0	261872
TDAPSFSDIPNPIGSEN	0	0	0	200836	296968
TDAPSFSDIPNPIGSENSE	0	0	106444	260152	596882
TDAPSFSDIPNPIGSENSEKTTMPLW	0	635196	313596	265604	150912
TDVE	0	1411535	2.68016e+06	4.19241e+06	4.50408e+06
TDVENL	0	0	0	28192920	0
TDVENLHLPLPL	0	49338	73850	46028	0
TDVENLHLPLPLLQ	0	879192	304404	329414	303944
TDVENLHLPLPLLQSW	0	77084	0	0	0
TE	0	555591	693169	1.47358e+06	1.89927e+06
TEDELQDKIHPF	0	108374	0	0	379192
TEE	1.97316e+06	11434278	11092483	8.10465e+06	9935960
TEEVKIT	0	0	168394	233236	195678
TESQ	0	0	0	357225	1.27855e+06
TESQSLTL	0	245882	180788	0	0
TESQSLTLTDVENL	0	294850	293870	0	0
TESQSLTLTDVENLHLPLPLLQ	0	141762	119120	95920	27318
TI/L-1	0	366006	2.07971e+06	7036586	16658368
TI/L-2	0	6.63528e+06	11668951	15517265	19203732
TIAS	0	0	519742	1.7444e+06	3724803
TIASGEPTSTPTTE	0	0	0	174194	0
TIASGEPTSTPTTEAVE	0	0	0	187064	0
TIASGEPTSTPTTEAVEST	0	0	0	116766	0
TKLTEEE	0	0	0	39396	122678
TKLTEEEKNRLNFL	0	0	94606	289728	278768
TLT	0	0	1354653	4388859	8714479
TLTDVE	0	675107	4.93181e+06	6.88174e+06	3947230
TLTDVENL	0	324460	1869958	4128940	3366138
TLTDVENLHLPLPL	0	93260	232182	96758	0
TLTDVENLHLPLPLLQ	0	1672800	970906	660330	254716
TLTDVENLHLPLPLLQSW	0	215554	62154	42008	0
TMPLW	0	300680	1.75646e+06	4.79992e+06	6323027
TPVVVPPFLQPE	0	0	0	58248	600388
TPVVVPPFLQPEVM	0	0	122622	321776	495280
TQ	0	0	0	984750	2.57884e+06
TQSL	791878	19905026	22528264	18999250	16611026
TQSLVYPFPGP	0	0	0	121732	0
TQSLVYPFPGPIPN	0	0	75520	0	0
TQTPVVVPPFLQPE	0	0	50950	189876	618628
TQTPVVVPPFLQPEVM	0	0	63706	527212	196086
TQTPVVVPPFLQPEVMG	0	0	0	71394	0
TVATL	0	0	0	1.15625e+06	2.3598e+06
TVQ	0	427903	821379	1.16085e+06	1.09432e+06
TVQVT	0	0	377832	993606	1.94769e+06
VA	0	0	0	467749	723553
VAPFPE	0	0	0	706847	1.29699e+06
VAPFPEVF	0	3226192	5209910	59234	5449390
VAPFPEVFG	0	88714	88602	0	0
VAPFPEVFGK	39510	688846	558924	394456	0
VAPFPEVFGKE	0	124736	162844	0	0
VAPFPEVFGKEK	0	446948	0	0	0
VAPFPEVFGKEKV	0	84130	0	0	0
VAPFPEVFGKEKVNE	0	1703652	572564	0	0
VAPFPEVFGKEKVNEL	0	3581546	7100912	776212	0
VATEEVKIT	0	0	92090	72572	0
VATL	0	0	432762	1.89655e+06	7.50946e+06
VDDKHYQK	0	0	118108	62442	170480
VDDKHYQKAL	0	0	254422	346252	319088
VF	0	1.45158e+06	4655237	6710630	6.69111e+06
VFGKEKVNE	0	49876	55384	66550	85410
VFGKEKVNEL	0	257678	397198	1321974	590712
VFTK	0	4.08837e+06	10185523	11901311	8.18347e+06
VI/L	0	0	0	807797	4.68987e+06
VIESPPEIN	0	0	0	1216908	0
VIPYVRYL	0	0	137210	189552	168636
VLNE	0	0	0	3815057	3962842
VLNENLL	0	0	85148	132680	76360
VLNENLLR	0	500960	1732688	1674248	511488
VLNENLLRF	0	112150	206808	115504	0
VLNENLLRFF	0	113638	48286	651962	279160
VLNENLLRFFVAPFPEVF	0	26198	0	0	0
VLPVPQK	0	26504	0	0	0
VLPVPQKAVPYPQ	0	0	0	113098	220402
VLPVPQKAVPYPQRDMPIQ	0	0	0	117934	372336
VM	0	1.49498e+06	4816932	4801785	5.32927e+06
VMGVS	0	620820	4.12581e+06	21338282	32348534
VNELSKDIGSE	0	0	0	41004	0
VPQLEIVPN	0	0	0	78884	0
VT	0	312904	1.00065e+06	2.09497e+06	3.36913e+06
VVRNANEEE	0	0	0	38262	0
VVVPPFLQPEVM	0	266316	405198	194378	125490
VYPFPGPIPN	0	295396	906636	483826	1980940
VYPFPGPIPNSL	0	0	0	117618	81776
VYPFPGPIPNSLPQ	0	80948	161628	210496	117188
VYPFPGPIPNSLPQNIPPLTQTPVVVPPFLQPEVM	0	0	155768	0	79646
WMHQPHQPLPPTVMFPPQSVL	0	0	0	0	118404
WQVL	0	3.18252e+06	8767478	15594203	23091208
YKVPQLE	0	64514	104376	184288	328082
YLGY	0	406758	1.41874e+06	2778206	4358606
YLGYLEQLLR	0	54922	0	0	0
YLGYLEQLLRLK	0	0	50060	56404	0
YLKTVYQH	0	0	0	78216	89124
YLKTVYQHQ	0	0	46144	436204	387126
YLQY	0	0	1.02216e+06	15943.9	27347.1
YLYQGPIVLNPWDQVKRN	0	0	115610	228080	189978
YPVEPFTESQSLTLTDVENLHLPLPL	0	0	0	95456	115106
YPVEPFTESQSLTLTDVENLHLPLPLLQSW	0	0	137182	392284	0
YQEPVLGPVRGPFPII	0	0	57016	80232	101856
YQEPVLGPVRGPFPIIV	0	796452	831084	1296016	2433834
YQGPIVLNPWDQVKR	0	0	80532	163954	99826
YQGPIVLNPWDQVKRN	0	0	561354	657806	2944372
YQKFPQYL	0	0	201892	486792	552224
YQKFPQYLQ	0	0	0	84472	161176
YQKFPQYLQY	0	0	105446	141072	82262
YQL	0	874905	2.22418e+06	3.35082e+06	4.28566e+06
YQLDAYPS	0	0	68682	99330	148970
YSI	0	0	217605	1.21025e+06	0
YTDAPSFSDIPNPIGSE	0	0	0	101798	267248
YTDAPSFSDIPNPIGSEN	0	0	0	145816	364568
YTDAPSFSDIPNPIGSENSE	0	0	90650	197844	192664
YTDAPSFSDIPNPIGSENSEKTTMPLW	0	651204	104240	851094	627054
YYQQKPVALIN	0	0	0	159044	0
YYVPL	0	0	0	953983	1.94349e+06
YYVPLGTQYTDAPSFSDIPNPIGSENSEKTTMPLW	0	107872	0	0	0

## Sheet: Peptide identification_papain
sequence	peak area
	DH=3%	DH=5.5%	DH=8%	DH=10.5%	DH=13%
AF	0	896886	6.77759e+06	11433054	11836952
AFL	0	1.11411e+06	1.94888e+06	2.36087e+06	2.35821e+06
AFLLYQEPVL	0	52710	0	0	0
AFLLYQEPVLGPVR	0	303516	0	0	0
AFLLYQEPVLGPVRGPFPIIV	0	153828	0	0	0
AI/L-1	0	0	0	501838	836005
AK	0	0	0	381558	613140
AKPAAVR	0	0	10964	0	0
AKYIPIQ	0	159718	0	0	0
AM	0	0	127556	686793	1.05066e+06
APFPE	0	0	0	541393	3501552
APFPEVF	0	1850796	3837098	603602	359050
APFPEVFG	0	240776	128046	271708	297328
APFPEVFGK	0	0	108222	392002	251760
APFPEVFGKEKVN	0	477592	860660	0	0
APKHKEMPFPKYPVEPFTE	0	122150	105274	0	0
APSFSDIPNPIG	0	272682	117088	173360	0
AQ	0	0	0	803392	1.05091e+06
AQQKEPMIG	0	938436	581422	0	0
ARHPHPHLSF	0	84314	0	0	0
ARHPHPHLSFM	0	78258	0	0	0
AV	0	0	0	0	1.2966e+06
AVE	0	171294	387461	964796	1200120
AVPYPQRDMPIQ	0	1566504	849468	422930	136752
AVPYPQRDMPIQAF	0	160088	184668	0	0
AW	0	392716	1.9353e+06	6.4611e+06	8687866
AWYYVPLG	52412	60946	83986	88400	0
AY	0	0	0	951572	1.90201e+06
DAPSF	0	0	1.05554e+06	9172135	11728117
DAPSFS	0	0	1049993	6.02425e+06	6173803
DAPSFSD	0	0	0	145796	162172
DAPSFSDIPNPIG	0	391862	2097372	914254	0
DELQDKIHPF	0	0	0	225144	448842
DELQDKIHPFA	0	0	185710	592266	337192
DELQDKIHPFAQ	0	0	304030	688632	1040566
DIK	0	0	0	0	1.76872e+06
DIPNPIG	0	631666	359178	613834	739098
DKIHPFA	0	0	0	743354	139226
DKIHPFAQ	0	0	108094	688768	597528
DMPIQ	0	0	1938449	866565	121302
DMPIQAF	0	0	81160	0	0
DQAMEDIK	0	0	0	95670	0
DVENLHLPLPL	0	0	66492	111732	43982
DVENLHLPLPLLQ	0	82480	134614	0	0
EAM	0	578422	2.14122e+06	2.73194e+06	2661162
EAMAPKHKEMPFPKYPVEPFTE	0	291246	142264	0	0
EELNVPG	0	0	0	0	131058
EGIHAQQKEPMIG	0	264490	112098	0	0
EGIHAQQKEPMIGVN	0	106030	0	0	0
EIVPN	0	0	0	920243	2.0809e+06
EIVPNSAEERLH	0	0	0	114772	0
EKVN	0	0	0	324282	650311
ELEELNVPG	0	0	0	145590	510610
ELEELNVPGE	0	0	0	178926	147106
ELEELNVPGEIVE	0	0	103388	202768	62286
EMPFPK	0	0	0	1.46365e+06	2.60041e+06
EMPFPKYPVEPFTE	0	114188	269340	0	0
ENLHLPLPL	0	0	0	101770	64452
ENLLRFF	0	101518	137446	0	0
ENSEKTTMPLW	0	158222	0	0	0
EPFTE	0	0	0	2.12259e+06	3777632
EPMIG	0	1.03779e+06	4948003	17546942	18243158
EPVL	0	0	3.05445e+06	9415527	10370475
EPVLG	0	0	0	1.52556e+06	2.15665e+06
EPVLGPVR	0	233506	0	0	0
EQLLRLK	0	67056	206930	179422	0
ESPPEINTVQ	0	129924	118830	0	0
ESQSLTLTDVENLHLPLPL	0	0	90964	0	0
ESQSLTLTDVENLHLPLPLL	0	146636	108028	0	0
ESQSLTLTDVENLHLPLPLLQ	0	520536	180494	0	0
EVI/L	0	524753	4005043	17920796	21040904
EVLNENLL	0	172048	158392	0	0
EVLNENLLR	0	2524408	2025340	392624	125162
EVLNENLLRF	0	50250	49072	0	0
EVLNENLLRFF	0	1755910	426776	50834	0
EVLNENLLRFFVAPFPEVF	0	386294	0	0	0
FA	0	0	0	0	652271
FAL	0	0	0	1.81725e+06	1.61267e+06
FF	0	1.05779e+06	3559610	9304697	11187583
FFVAPFPEVF	0	998482	563896	36486	16830
FFVAPFPEVFG	0	161620	48594	0	0
FFVAPFPEVFGK	26270	73666	0	0	0
FFVAPFPEVFGKEK	9748	0	0	0	0
FFVAPFPEVFGKEKVN	0	487630	327776	0	0
FIF	0	0	0	1219536	1.8868e+06
FLLYQEPVLGPVR	0	89604	0	0	0
FM	0	0	0	773343	1.19246e+06
FPQYLQ	0	0	0	2.08902e+06	2113834
FR	0	0	0	2482036	3543305
FSDIPNPIG	0	159536	919542	477224	416120
FV	0	0	0	847224	1.39039e+06
FVAPFPE	17424	0	0	0	0
FVAPFPEVF	0	176128	203576	185054	43942
FVAPFPEVFG	0	0	158908	0	0
FVAPFPEVFGKEKVN	0	137724	81860	0	0
FYPELF	0	0	2.62416e+06	5832246	5476105
FYPELFR	0	299674	252526	739452	325168
FYQ	80519.7	0	0	1324788	2.19659e+06
GIHAQQKEPMIG	0	52976	0	0	0
GK	0	0	0	0	374913
GLNYYQQKPVA	0	125768	167042	0	0
GLPQ	0	0	1.144e+06	3.57146e+06	3.30301e+06
GLPQEVL	0	0	93206	0	0
GLPQEVLNENLLR	0	287560	55068	0	0
GLPQEVLNENLLRFF	0	135678	0	0	0
GPFPII	0	0	0	0	1.8839e+06
GPFPIIV	0	879030	272266	71278	66974
GPIVL	0	3.94274e+06	11256192	15512889	10644999
GPVRGPFPIIV	0	191098	0	0	0
GY	0	0	256188	729035	832825
GYL	0	0	0	987109	1.55979e+06
GYLE	0	1.08052e+06	1.30629e+06	1.91374e+06	1.96996e+06
GYLEQLLR	0	117042	274646	98102	66954
GYLEQLLRLK	0	207638	314506	137658	0
HIQ	0	0	0	1.37854e+06	3.04814e+06
HIQKEDVPSE	0	0	35826	0	0
HIQKEDVPSERYL	0	49584	0	0	0
HKEMPFPK	0	0	104184	547768	679096
HKEMPFPKYPVEPFTE	0	214738	285236	0	0
HLPLPLLQ	0	0	148050	77512	0
HPHPHLS	0	52098	0	0	0
HPHPHLSF	0	230892	1183432	0	0
HPHPHLSFM	0	189264	127466	0	0
HPIK	0	0	351287	2.16277e+06	2.85239e+06
HPIKHQGLPQEVL	0	34032	0	0	0
HQGLPQEV	0	86926	0	0	0
HQGLPQEVL	0	154824	863938	122646	0
HQGLPQEVLN	0	61624	0	0	0
HQGLPQEVLNE	0	79436	0	0	0
HQGLPQEVLNENL	0	27474	0	0	0
HQGLPQEVLNENLL	0	313516	0	0	0
HQGLPQEVLNENLLR	0	596786	94936	0	0
HQGLPQEVLNENLLRF	0	66386	0	0	0
HQGLPQEVLNENLLRFF	0	1750082	0	0	0
HQGLPQEVLNENLLRFFV	0	245312	0	0	0
HQGLPQEVLNENLLRFFVAPFPEVF	0	1528462	0	0	0
HQGLPQEVLNENLLRFFVAPFPEVFG	0	229850	0	0	0
HQPHQPLPPTVM	0	41068	109892	253684	0
HSM	0	0	0	0	396991
I/LA-1	0	0	0	261944	356818
I/LE-1	0	0	448190	2.5831e+06	3.77264e+06
I/LE-2	0	0	0	4.97561e+06	6940868
I/LF	0	0	565912	5901745	12090596
I/LK-2	0	0	77129.9	317398	590430
I/LQ	0	79590.8	651918	2.24717e+06	2439387
I/LR-2	0	0	0	613417	580494
I/LR-4	0	0	0	0	1.36961e+06
I/LS	0	0	0	0	528268
I/LV-1	0	0	0	0	1.95902e+06
IIV	0	0	0	1.09451e+06	1.90109e+06
IL/LI/II/LL	0	0	383524	2.51083e+06	4545894
ILQWQVL	0	0	160408	0	0
ILQWQVLSNTVPAK	0	39332	0	0	0
IPIQ	0	0	1429934	12540787	17163986
IPNPIG	0	1208596	6.48466e+06	16782562	21920396
IPNSLPQ	0	0	0	72308	0
IPPLT	0	625212	2.57749e+06	11399290	20635180
IPTI	0	0	0	1.46358e+06	1.80074e+06
IPTIN	0	0	1.35448e+06	5742443	5.86532e+06
IPTINTIA	0	0	90208	0	0
IVLN	0	0	0	0	1.0464e+06
KAVPYPQ	0	0	28898	0	0
KAVPYPQRDMPIQ	0	571686	578838	0	0
KAVPYPQRDMPIQAF	0	200800	0	0	0
KEDVPSE	0	26018	44056	257132	355314
KEDVPSERYL	0	129616	239784	0	0
KEGIHAQ	0	0	446608	44326	0
KEGIHAQQKEPMIG	0	147718	0	0	0
KEMPFPK	0	0	0	98026	116392
KEMPFPKYPVEPFTE	0	61984	307284	0	0
KNQDKTE	0	0	0	0	70274
KTTMPLW	0	0	82156	0	0
KVKEAMAPKHKEMPFPKYPVEP	0	177048	0	0	0
KVLPVPQ	0	0	421898	1445228	453626
KYKVPQLEIVPNSAEERLHSM	0	97510	0	0	0
KYPVEPFTE	0	0	0	337574	207858
LAL	0	0	0	1.45173e+06	2.14958e+06
LAY	138102	0	0	2.94774e+06	2952525
LD	0	0	0	0	834775
LDAYPSG	0	0	117692	142998	0
LEIVPNSAEERLH	0	132982	183390	120610	0
LEIVPNSAEERLHS	0	605338	343680	1067542	0
LEIVPNSAEERLHSM	0	0	138940	0	0
LEQLL	0	0	1.095e+06	1.72661e+06	1.19978e+06
LEQLLRLK	0	435334	259594	401098	89804
LFR	0	0	0	454282	662896
LGAQEQNQEQPIR	0	0	0	72618	0
LGY	179992	0	0	901614	1.16022e+06
LGYLEQLLRLK	0	0	109100	0	0
LHLPLPL	0	0	82352	248798	74800
LHLPLPLL	0	0	68252	64452	0
LHLPLPLLQ	0	0	183748	59168	0
LI/LI	0	0	0	1.27736e+06	2.06119e+06
LIN	0	196728	1.11423e+06	4318530	5839113
LINNQFLPYPYYAKPAAVR	0	117840	122016	0	0
LLY	0	3782615	12146361	11572123	7.7677e+06
LLYQEPVL	0	199536	80678	0	0
LLYQEPVLGPVR	0	827902	120948	0	0
LLYQEPVLGPVRGPFPIIV	0	66948	0	0	0
LNENLLR	0	89146	0	257962	226412
LNENLLRFF	60964	0	0	0	0
LNYYQ	0	182663	1.12898e+06	884770	627660
LNYYQQKPVA	0	73134	240892	0	0
LPLPL	0	0	2.52083e+06	30822658	54078524
LPLPLL	0	439526	2.33581e+06	10720837	8773712
LPLPLLQ	0	122308	388856	319280	52982
LPQ	0	274342	2.60842e+06	18740304	29930646
LPQE	0	0	0	1.12798e+06	2.53913e+06
LPQEVLNENLLR	0	171074	0	0	0
LPQEVLNENLLRFF	0	40482	0	0	0
LPQEVLNENLLRFFVAPFPEVF	0	62630	0	0	0
LPQNIPPLTQ	0	210782	0	0	0
LPVPQ	0	0	0	4399318	8363289
LPYPYY	0	0	0	3.15367e+06	7369579
LPYPYYA	0	0	0	101156	173676
LQPEVM	0	920370	5485054	11551367	6.45662e+06
LQSWMHQPHQPLPPTVM	0	163216	0	0	0
LSF	0	541176	3.43333e+06	8.04811e+06	6.98931e+06
LSL	0	783173	6607836	11664260	11295912
LSLS	0	0	0	793171	747959
LTDVE	0	0	389399	3398476	4.22061e+06
LTDVENLHLPLPL	0	0	83614	77282	0
LTDVENLHLPLPLL	0	0	131254	0	0
LTDVENLHLPLPLLQ	0	193266	276174	0	0
LTL	0	0	1.13805e+06	8627249	10885774
LTLTDVE	0	0	202584	265000	0
LTLTDVENLH	0	0	121360	111092	0
LTLTDVENLHLPLPL	0	0	335124	60940	0
LTLTDVENLHLPLPLL	0	48020	208490	0	0
LTLTDVENLHLPLPLLQ	0	388468	888374	38938	0
LVYPFPGPIPN	0	0	0	158306	45342
LVYPFPGPIPNSLPQ	0	0	518998	218396	90684
LW	201439	0	418742	1991290	3098231
LY	0	902184	5.97861e+06	16039299	17873412
LYQ	0	0	754591	1.38229e+06	1.44869e+06
LYQEPVL	0	110774	230620	0	0
LYQEPVLGPVR	0	518076	138250	0	0
MF	0	0	0	0	708699
MHQPHQPLPPTV	0	35838	0	0	0
MHQPHQPLPPTVM	0	113640	639106	134556	0
MI	0	0	325385	2.43485e+06	3.91799e+06
MPI/L	0	0	0	0	2402580
MPLW	1312564	37282684	46354504	42705816	39520352
NENLL	0	1.33146e+06	3.10698e+06	5508189	6072733
NENLLRF	0	70464	94050	0	0
NENLLRFF	0	753440	1979424	220102	0
NENLLRFFV	0	302700	82216	0	0
NENLLRFFVAPFPEVF	0	156154	108652	0	0
NENLLRFFVAPFPEVFG	0	94736	0	0	0
NIPPLT	0	5.81107e+06	10063366	6861329	6032119
NIPPLTQ	0	795838	397266	327830	0
NLH	0	0	0	1.28613e+06	1.85145e+06
NLHLPLPL	0	0	94884	198800	154526
NLHLPLPLL	0	113444	127002	189520	77036
NLHLPLPLLQ	0	542514	1797696	322708	46238
NLL	0	0	0	0	729681
NQEQPIR	0	0	0	79284	36204
NQFLPYPYY	0	0	132674	125076	86570
NQFLPYPYYA	0	0	73166	0	0
NQFLPYPYYAKPAAVR	0	66498	198524	0	0
NSLPQNIPPLT	0	134184	0	0	0
NSLPQNIPPLTQ	0	208042	0	0	0
NYYQ	0	0	0	2.11395e+06	1.86159e+06
NYYQQKPVA	0	0	70988	0	0
PEVFGKEK	0	0	0	0	105350
PEVMGVSKVKEAMAPKHKE	0	21964	0	0	0
PFPEVF	0	0	0	873525	1.56428e+06
PFPEVFGK	0	0	0	54414	0
PFPIIV	0	0	2.87346e+06	11482640	14240128
PIGSENSEKTTMPLW	117556	0	0	0	0
PIK	0	0	0	873804	877249
PK	0	0	445214	829211	2245561
PNPIG	0	0	2.60983e+06	5191498	4.48203e+06
PPFLQPEVM	0	0	0	0	178418
PPFLQPEVMG	0	156132	221986	0	0
PPFLQPEVMGV	0	67156	323864	106784	0
PPFLQPEVMGVS	0	0	160896	37748	0
PPFLQPEVMGVSKVK	0	20812	373254	0	0
PPFLQPEVMGVSKVKE	0	115998	40796	0	0
PPFLQPEVMGVSKVKEAMAPK	0	31924	0	0	0
PPK	0	0	0	49888	470217
PQ	0	0	0	208039	218670
PQEVLNENLLRFFVA	0	95752	0	0	0
PQKAVPYPQ	0	120004	0	0	0
PSGAWYYVP	121008	0	0	0	0
PSGAWYYVPLGTQ	130186	0	0	0	0
PTVMFPPQ	0	0	42430	0	0
PVEPFTESQ	0	0	0	186302	0
PVEPFTESQSL	0	0	0	0	24014
PVPQ	0	0	0	3127243	4307340
QAMEDIK	0	0	18350	0	0
QEPVLGPVR	0	349364	0	0	0
QKEPMIG	0	237624	0	0	0
QPEVMGV	0	89344	92050	107088	0
QPEVMGVS	0	82998	91130	0	0
QPHQPLPPTVM	0	83254	147276	0	0
QPLPPTVMFPPQ	0	0	80442	0	0
QQTEDELQDKIHPFAQ	0	0	41236	0	0
QTEDELQDKIHPFAQ	0	205368	0	0	0
RDMPIQAF	0	0	178012	93208	0
RELEELN	0	64974	94532	341300	735716
RELEELNVPG	0	0	290428	883642	927460
RELEELNVPGE	0	0	190332	413634	174978
RELEELNVPGEIVE	0	450326	474718	262454	0
RELEELNVPGEIVES	0	49152	0	0	0
RFFVAPFPEVF	0	196376	0	0	0
RGPFPIIV	0	79484	39936	162448	174734
RPKHPIK	59794	233250	42062	0	0
RQFYQLD	0	0	185368	0	0
SDIPNPIG	0	164072	1245742	1098460	1469972
SDIPNPIGSENSEKTTMPLW	0	58188	0	0	0
SEEQQQTEDELQDKIHPFAQ	0	0	0	102458	0
SEKTTMPLW	170242	0	0	0	0
SENSEKTT	0	147512	376582	766692	275148
SENSEKTTMPLW	822682	2587112	238254	0	0
SESTEDQAMEDIK	0	120422	0	0	0
SFF	0	0	0	0	388546
SFM	0	704187	1.77641e+06	2.59085e+06	2145828
SGEPTSTPTTEAVE	0	91732	41900	0	0
SI/L	0	81865.2	0	2.25685e+06	3011375
SK	0	83851	84666.5	556019	996307
SKVLPVPQ	0	108432	287474	287276	1665784
SKVLPVPQK	0	30664	41808	0	0
SLPQ	0	0	1574536	8321511	8713450
SLPQNIPPLTQ	0	82996	0	0	0
SLSQ	0	149604	681461	606981	409003
SLSQSKVLPVPQ	0	161760	212370	0	0
SLSQSKVLPVPQK	0	67464	0	0	0
SLTL	0	0	716802	3.18595e+06	2.99305e+06
SLTLTDVE	0	0	0	124678	0
SLTLTDVENLH	0	0	124136	66204	0
SLTLTDVENLHLPLPL	0	0	261452	0	0
SLTLTDVENLHLPLPLL	0	0	154418	0	0
SLTLTDVENLHLPLPLLQ	0	368532	759942	0	0
SLVYPFPGPIPNSLPQ	0	77908	180478	190014	0
SLVYPFPGPIPNSLPQNIPPLT	0	94212	0	0	0
SLVYPFPGPIPNSLPQNIPPLTQ	0	176928	0	0	0
SM	0	0	0	498024	749608
SMK	0	0	106235	880025	1.37933e+06
SMKEGIHAQ	0	21692	42794	0	0
SMKEGIHAQQKEPMIG	0	269648	0	0	0
SNTVPAK	0	83092	78058	561486	370108
SPAQILQWQVL	0	121186	83000	0	0
SPAQILQWQVLSN	0	54526	0	0	0
SPAQILQWQVLSNTVPAK	0	93156	0	0	0
SPPEIN	0	0	6303142	5.36367e+06	5.24497e+06
SPPEINTVQ	0	665182	133676	189452	0
SPPEINTVQVT	0	440814	0	0	0
SPPEINTVQVTSTAV	64776	0	0	0	0
SQSKVLPVPQ	0	279892	1791868	338850	173038
SQSKVLPVPQK	0	213894	221360	0	0
SQSLTLT	0	64182	83948	0	0
SQSLTLTDVE	0	100164	80390	0	0
SQSLTLTDVENLH	0	134758	232354	0	0
SQSLTLTDVENLHLPLPL	0	143696	366156	0	0
SQSLTLTDVENLHLPLPLL	0	655644	252710	0	0
SQSLTLTDVENLHLPLPLLQ	0	2190654	2001150	0	0
SR	0	0	0	137924	247256
SRYPSYG	0	0	47124	0	0
STAV	0	11061068	6404585	2449029	1.59721e+06
STVATLE	0	56074	0	0	0
STVATLEDSP	102384	0	0	0	0
STVATLEDSPEVIES	0	198206	0	0	0
SVL	0	1199278	5434030	8184886	7.93395e+06
SVLSLSQ	0	202190	0	0	0
SVLSLSQSKVLPVPQ	0	165796	0	0	0
SVLSLSQSKVLPVPQK	0	137132	0	0	0
SW	0	901296	2912539	5.94995e+06	7.20903e+06
SWMHQPHQPLPPTV	0	93778	0	0	0
SWMHQPHQPLPPTVM	0	915940	633532	0	0
SWMHQPHQPLPPTVMFPPQ	0	72878	0	0	0
SY	0	0	0	215597	378336
TAV	0	203500	1.03856e+06	1.08734e+06	2.00254e+06
TDAPSFSDIPNPIG	0	0	137308	0	0
TDVE	0	0	0	2.00847e+06	3.04267e+06
TDVENLH	0	0	112226	107360	126148
TDVENLHLPLPL	0	63126	923290	963344	0
TDVENLHLPLPLL	0	172902	567236	119316	40018
TDVENLHLPLPLLQ	0	812844	2700584	93420	0
TEDELQDKIHPFA	0	0	0	0	196476
TEDELQDKIHPFAQ	0	0	0	0	130756
TF	0	0	0	1.02496e+06	1.84868e+06
TI/L-1	0	0	0	0	707905
TLTDVENLH	0	0	0	231610	0
TLTDVENLHLPLPL	0	0	85610	0	0
TLTDVENLHLPLPLLQ	0	93642	205232	0	0
TMPLW	0	1398174	2455529	1.83504e+06	1501813
TPTL	0	0	0	693611	1.04594e+06
TPTTEAVE	0	13608	51034	0	0
TPVV	0	1.74754e+06	4460665	6215347	7.85704e+06
TPVVV	0	0	0	0	940054
TPVVVPPF	0	40954	78344	0	0
TPVVVPPFL	0	81756	106126	0	0
TPVVVPPFLQPEVM	0	3021090	1720206	76218	67936
TPVVVPPFLQPEVMG	0	478264	180910	0	0
TPVVVPPFLQPEVMGVS	0	226826	0	0	0
TPVVVPPFLQPEVMGVSKVK	0	228690	0	0	0
TPVVVPPFLQPEVMGVSKVKE	0	62922	0	0	0
TQSLVYPFPGPIP	0	36112	0	0	0
TQSLVYPFPGPIPN	0	52722	0	0	0
TQSLVYPFPGPIPNSLPQ	0	319512	193092	0	0
TQSLVYPFPGPIPNSLPQNIPPLT	0	135090	0	0	0
TQSLVYPFPGPIPNSLPQNIPPLTQ	0	121530	0	0	0
TQYTDAPSF	0	0	157376	0	0
TQYTDAPSFS	0	167012	135200	0	0
TQYTDAPSFSDIPNPIG	245202	857176	896046	157564	0
TQYTDAPSFSDIPNPIGSENSEKTTMPLW	2452344	287118	0	0	0
TVQVTSTAV	17858	0	0	0	0
VAPFPEVF	0	684356	1259654	428190	237402
VAPFPEVFG	0	191246	285818	114542	0
VAPFPEVFGK	0	86886	44056	71158	0
VAPFPEVFGKEKVN	0	452586	597868	0	0
VAPFPEVFGKEKVNE	16198	0	0	0	0
VAPFPEVFGKEKVNELS	0	78016	0	0	0
VENLHLPLPL	0	0	289212	127284	0
VENLHLPLPLL	0	104228	114100	0	0
VENLHLPLPLLQ	0	354708	528038	62342	46968
VF	0	0	0	2056620	4.45283e+06
VI/L	0	0	0	1247840	2.30731e+06
VIE	0	0	0	1.04829e+06	1.88161e+06
VK	0	91759.8	229417	437574	522891
VLNENLLR	0	0	343256	122932	0
VLNENLLRFF	0	37060	126290	0	0
VLPVPQ	0	0	1.30474e+06	5253348	15847436
VLPVPQK	0	0	59348	271628	321174
VLSL	0	900531	6.21103e+06	6281516	3.95653e+06
VM	0	59153.9	328992	2.16133e+06	6291591
VN	0	0	0	1.84856e+06	2.47699e+06
VNQELAY	0	618320	210498	170784	0
VNQELAYFYPELFRQFYQLDAYP	48414	0	0	0	0
VPGEIVE	0	0	0	179214	317364
VPI/L	0	0	0	0	3309504
VPITPTL	0	0	0	1.71872e+06	2.00238e+06
VPLG	0	916807	5430046	28973242	37368384
VPPFL	0	583937	5.05626e+06	22852692	28289744
VPPFLQPEVM	0	136772	343412	314680	100642
VPPFLQPEVMG	0	288324	108822	0	0
VPPFLQPEVMGVS	0	127698	107520	0	0
VPQLEIVPNSAEERLHS	0	347988	0	0	0
VPYPQ	0	0	1.11683e+06	12426315	18323976
VPYPQRDMPIQ	0	230018	785978	862422	137480
VPYPQRDMPIQAF	0	0	98908	0	0
VR	0	4640089	10629869	9139183	8204571
VT	0	100111	0	1.50473e+06	1.96618e+06
VY	0	0	0	893385	1.73126e+06
VYPFPGPIPN	0	0	0	272284	279242
VYPFPGPIPNSLPQ	0	113012	915120	192050	347460
WMHQPHQPLPPTVM	0	182650	307642	0	0
WYY	0	0	0	859519	1.69598e+06
WYYVPLG	0	88162	148996	200306	0
YI/L	0	1.45877e+06	3723211	11606846	14466332
YLEQLLR	0	95300	179874	141310	0
YLEQLLRLK	0	278058	583280	0	0
YLGYLEQLLR	22202	0	0	0	0
YLY	0	0	0	0	1.93354e+06
YPELF	0	0	2.20586e+06	12732372	18529234
YPFPGPIPN	0	0	0	528700	827740
YPFPGPIPNS	0	0	0	0	70902
YPFPGPIPNSLPQ	0	43614	208568	424872	518560
YPQRDMPIQ	0	0	71658	0	0
YPSG	0	0	473624	2.91344e+06	4086598
YPSY	0	0	781242	2.70111e+06	3.40393e+06
YPSYG	0	0	1.44656e+06	3.29254e+06	3.1921e+06
YPVEPFT	0	57718	131858	601056	118530
YPVEPFTE	0	283346	1121138	663574	2744406
YPVEPFTES	0	265548	0	0	0
YPVEPFTESQSLTLTDVENLHLPLPLL	0	181092	0	0	0
YPVEPFTESQSLTLTDVENLHLPLPLLQ	0	436464	0	0	0
YPVEPFTESQSLTLTDVENLHLPLPLLQSW	0	0	0	45740	0
YQEPVL	0	1.27593e+06	5395177	3.21254e+06	1.07559e+06
YQEPVLGPVR	0	664944	141718	0	0
YQLD	0	0	674929	2649059	4224553
YTDAPSF	0	0	197518	636936	361258
YTDAPSFS	0	0	154158	271134	152158
YTDAPSFSDIPNPIG	0	149126	1445936	240290	0
YTDAPSFSDIPNPIGSENSEKTTMPLW	0	74158	0	0	0
YVL	0	0	2.97911e+06	5.74829e+06	7091622
YVLS	0	1.15597e+06	1.94202e+06	2.13976e+06	1.94452e+06
YVPLG	0	0	3.64448e+06	8366198	6505862
YY	0	0	0	1.41926e+06	3.38071e+06
YYQ	0	0	96607.6	700813	1.04983e+06

## Sheet: Peptide identification_neutrase
sequence	peak area
	DH=3%	DH=5.5%	DH=8%	DH=10.5%	DH=13%
AAVRSPAQ	0	0	23574	0	0
AF	0	0	121926	307768	1.89175e+06
AFLLYQEPVLGPVRGPFP	0	0	0	55892	74754
AI/L-1	0	0	25441.3	145297	1.14952e+06
AIPPKKNQDKTEIPTINT	0	247874	165556	0	0
AK	0	0	0	0	191405
AKPAA	0	0	0	0	440963
ALNE	0	144658	1.1512e+06	2.17523e+06	2777936
ALNEINQ	0	43382	304858	108108	147090
ALNEINQFYQKFPQY	0	536704	268598	0	0
ALNEINQFYQKFPQYLQY	0	89506	0	0	0
ALPQY	0	0	124641	6507.55	10860.6
ALPQYLKT	0	178496	84632	0	0
APSFSDIPNPIGSENSEKTTMP	0	0	46238	0	0
AQQKEPM	0	0	0	0	75042
AQQKEPMIG	0	0	0	74614	227070
ATLEDSPEVIESPPEINT	0	0	0	0	97522
AV	0	0	739440	1.31901e+06	3001093
AVPITPT	0	1675190	1618508	2147404	4715602
AVPITPTL	0	0	52062	147662	291870
AVPYPQ	0	0	0	0	2.85368e+06
AVPYPQRDMP	0	1025470	3642294	11706664	4568138
AVPYPQRDMPI	0	0	0	0	563342
AVPYPQRDMPIQ	0	0	0	85000	0
AVPYPQRDMPIQA	0	667258	1695866	2272848	300080
AVPYPQRDMPIQAF	0	724032	1656046	1396610	186360
AVPYPQRDMPIQAFL	0	474080	0	0	0
AW	0	0	0	0	1.37223e+06
AWY	0	0	0	0	3.41326e+06
AY	0	0	209356	717052	3.20727e+06
AYPSGAW	0	0	0	0	130798
AYPSGAWY	0	0	0	0	206466
DMPIQAFLLYQEPVLGPVRGPFPIIV	35012	0	0	0	0
EDELQDKIHP	0	0	0	0	148882
EGIHAQQKEPMIGVNQE	0	114200	0	0	0
EK	0	0	633093	2.3758e+06	5685884
ELAYFYPELFRQ	0	400750	422730	154244	0
ELN	0	0	0	4.6431e+06	5.65506e+06
EMPFPKYP	0	0	0	80218	235430
EMPFPKYPVEP	0	0	33728	103982	72704
EPVLGPVR	0	0	0	93008	190218
ER	0	0	0	0	365453
EVLNENLLRF	65996	37866	0	0	0
FALPQYL	0	33026	112528	106502	0
FALPQYLKT	0	752766	91302	0	0
FAQ	0	0	0	0	28144.4
FAQTQS	0	4099592	9907066	17461764	12355051
FAQTQSL	0	0	140276	159506	0
FAQTQSLVYPFPGP	0	0	0	0	191936
FF	2.29155e+06	59502936	72211128	74056192	64057140
FIF	0	631022	5150397	10436785	11347346
FLL	0	0	458858	2.5285e+06	7.79872e+06
FLLYQEPVLGPVRGPFPIIV	23744	0	0	0	0
FLPYPYY	0	0	94472	0	451048
FLPYPYYAKP	0	0	218704	0	98748
FLPYPYYAKPAA	0	0	121940	0	0
FLQPEVMG	0	0	0	115096	246224
FM	0	5.98536e+06	10543430	16269249	16450857
FMAIPPKKNQDKTEIPT	0	98292	84770	0	0
FMAIPPKKNQDKTEIPTINT	0	683770	232282	0	0
FPGPIPN	0	295678	0	0	0
FQSEEQQQTEDE	0	0	122182	0	0
FQSEEQQQTEDELQDKIHPFAQTQS	0	0	154208	0	0
FR	132151	4.61596e+06	10024865	14328773	9682745
FRQF	0	0	0	0	496188
FSDIPNP	0	0	0	0	216946
FSDIPNPIGSENSEKTTMP	0	0	0	123126	740278
FSDK	0	0	0	0	316404
FSDKIAKYIP	0	0	383376	0	164726
FSDKIAKYIPIQY	0	99284	461038	0	0
FTESQS	0	0	0	0	5.13436e+06
FTESQSLT	0	0	105070	0	0
FTESQSLTLTDVENLHLPLP	0	49590	49470	0	0
FVAPFPE	84498	3265164	717486	5855350	381822
FVAPFPEVFGK	89698	66364	169376	75102	0
FVAPFPEVFGKEK	0	275256	321722	0	0
FVAPFPEVFGKEKV	32260	0	0	0	0
FVAPFPEVFGKEKVNE	352132	4905528	1933762	1713840	0
FY	0	0	0	0	1.34398e+06
FYPE	0	7331209	36565960	62881764	71400296
FYPELFRQ	0	1283364	1804404	653042	148728
FYPELFRQFYQ	0	153020	99946	54152	0
FYQ	106986	17927398	40675904	54313432	55010148
FYQKFPQ	0	0	0	0	152888
FYQKFPQY	0	1231446	810164	527572	283760
FYQKFPQYL	0	0	218742	436334	229462
FYQL	0	0	0	1.35816e+06	1.62272e+06
GAW	0	0	0	0	1.32144e+06
GAWY	0	0	0	1.91325e+06	7463061
GAWYYVP	0	0	0	45932	131572
GE	0	0	0	0	878242
GIHAQQKEPMIGVNQE	0	232754	0	0	0
GLPQEVLNENL	0	0	0	0	232382
GLPQEVLNENLLR	0	199660	330866	243012	0
GLPQEVLNENLLRF	0	394140	543674	158108	0
GLPQEVLNENLLRFF	0	82402	0	0	0
GSENSEKTTMPLW	53082	0	0	0	0
GY	0	0	27446.6	44768.5	84565.9
HAQQKEPMI	0	0	92240	0	0
HIQKEDVPSERY	0	29546	50440	52144	111846
HKEMPFPKYP	0	0	0	106156	213320
HKEMPFPKYPVEP	0	0	0	87330	101852
HKEMPFPKYPVEPFTESQS	0	0	86164	141628	0
HLPLPLLQSW	0	0	0	0	61318
I/LE-1	0	1.23615e+06	4510015	11136989	13700456
I/LE-2	0	2.86411e+06	11124777	25436248	29533552
I/LF	0	10188821	18113722	29639668	52110332
I/LGP	0	0	0	0	900298
I/LK-1	0	0	0	495779	1.2416e+06
I/LLQ	0	0	603958	1.36381e+06	994374
I/LQ	0	0	0	81907.8	385492
I/LQY	635106	32067460	31562988	29529512	25661876
I/LR-1	0	0	2.34619e+06	5.83053e+06	9518755
I/LR-2	0	959518	2.18591e+06	4.28791e+06	2.10232e+06
I/LR-3	0	0	644807	1.58087e+06	1.15799e+06
I/LR-4	0	0	0	0	65699.7
I/LS	0	1.2901e+06	1.51854e+06	2.4072e+06	2.83894e+06
I/LSQ	117487	3.72725e+06	5958981	10739562	15700361
I/LT-1	0	1.46348e+06	4.91556e+06	12270078	16827824
I/LT-2	0	316117	1.29985e+06	3.97392e+06	6195916
I/LV-2	0	0	0	0	1.54492e+06
IAKYIPI	0	0	0	0	202896
IAKYIPIQY	0	0	164960	0	0
IASGEPTSTPT	0	41526	123940	0	211666
IASGEPTSTPTT	0	0	55302	0	0
IASGEPTSTPTTE	0	0	0	0	136250
IASGEPTSTPTTEAVEST	0	0	0	0	176132
IEK	0	0	0	0	1.61322e+06
IEKFQSEEQQQ	0	0	0	0	1948894
IGSENSEKTTMP	0	75086	130254	261552	631628
IGVNQE	0	1.80825e+06	6955523	16534014	22518418
IGVNQEL	0	0	0	115772	165308
IGVNQELAY	0	0	58368	0	0
IHAQQKE	0	0	180066	0	0
IHAQQKEPM	0	83734	134222	191176	251866
IHAQQKEPMIG	0	409736	260424	361610	654206
IHAQQKEPMIGV	0	0	0	0	195598
IHAQQKEPMIGVNQ	0	85552	65552	0	0
IHAQQKEPMIGVNQE	34160	4498544	6295056	3392434	486282
IHAQQKEPMIGVNQEL	0	134506	159362	152712	0
IHAQQKEPMIGVNQELAY	0	578178	479818	192878	0
IHAQQKEPMIGVNQELAYFYPE	0	131460	0	0	0
IHAQQKEPMIGVNQELAYFYPELFRQ	0	152402	81010	0	0
IHPFAQTQS	59926	184420	172080	0	0
IIS	0	0	0	0	1.28457e+06
IIV	0	7453641	19470790	46786952	92617256
IKHQGLPQE	0	0	0	0	612058
IKHQGLPQEVLNEN	0	361400	709156	1849758	501122
IKHQGLPQEVLNENL	0	122268	3439966	1857314	1415374
IKHQGLPQEVLNENLLR	0	208478	756334	332922	0
IKHQGLPQEVLNENLLRF	0	1298622	791238	205574	0
IKHQGLPQEVLNENLLRFF	47948	544588	48754	0	0
IL/LI/II/LL	0	544612	2.74182e+06	10761090	41647756
ILQWQ	0	1.0019e+06	2.84599e+06	5.644e+06	10100208
ILQWQV	0	1.50945e+06	4.23025e+06	7.48018e+06	7.6522e+06
ILT	0	0	0	0	2.52015e+06
INNQFLPYPYY	0	0	104580	0	241074
INPSKEN	0	605718	902782	313752	181172
INQFYQKFPQY	0	139956	90384	0	0
INT	0	1830845	2762054	4610943	6.87179e+06
INTI	0	0	0	0	1142242
IPPLTQTPVVVPPF	0	0	43938	82982	240852
IPPLTQTPVVVPPFLQPEVMG	0	0	43938	0	0
IQAFL	0	7727402	8759922	3.94186e+06	1595717
IQAFLLYQEPVLGPVRGPFPIIV	104904	0	0	0	0
IQKEDVPSERY	0	303982	218726	275888	483322
IQKEDVPSERYL	0	0	91672	286196	242588
IQKEDVPSERYLGY	0	100228	0	0	0
IQPE	0	0	214964	802974	3.51426e+06
IQYV	0	451428	1.68807e+06	2.99876e+06	3.17613e+06
ISQRYQK	0	40004	303312	0	0
ISQRYQKF	0	51902	96318	0	0
IVES	0	0	0	60523.5	628862
IVLNPWDQ	0	0	0	0	109224
IVLNPWDQVKRN	0	0	0	107338	0
IVPNSAEER	0	21766	81630	177066	243204
IVPNSAEERLHS	0	37278	282416	176270	0
IVPNSAEERLHSMKEG	0	251216	420694	0	0
KALNEINQFYQ	0	60296	125054	0	668556
KAVPYPQRDMP	0	0	50106	0	0
KAVPYPQRDMPIQAF	0	85768	82500	0	0
KIHPFAQTQS	0	0	165524	196730	0
KNTMEHVSSSEESII	0	36090	0	0	0
KTVDMESTEVFTKKTK	0	74576	124072	72338	0
KYKVPQLE	0	0	77080	69578	0
LAY	0	17160886	40227816	58910824	49318192
LAYF	0	0	1.14074e+06	3.02399e+06	2.3427e+06
LAYFYPELFRQ	0	561938	65408	0	0
LAYFYPELFRQFYQ	0	85230	0	0	0
LDAYPSG	0	47398	137790	505884	204710
LDAYPSGAW	0	81444	181844	563714	1592122
LDAYPSGAWY	0	94354	257600	226242	727936
LDAYPSGAWYYVP	0	98408	199190	261830	877672
LDAYPSGAWYYVPLGTQYTD	0	0	208314	600596	0
LDAYPSGAWYYVPLGTQYTDAP	0	82568	111720	0	0
LEE	0	0	0	120755	833949
LEEL	0	0	0	717321	1.41124e+06
LEI	0	0	0	800592	3.43651e+06
LEIVPNS	0	103972	0	0	0
LEIVPNSA	0	44064	0	0	0
LEQ	0	412528	3.13602e+06	8.20921e+06	9403626
LEQL	0	4.92797e+06	28298680	65218236	35562720
LEQLLRLK	0	112716	0	0	0
LEQLLRLKKYKVPQLE	0	129000	187152	0	0
LFR	0	1.87994e+06	4444592	6798256	5160468
LGPVRGPFP	0	0	73706	447188	2695080
LGPVRGPFPI	0	0	0	0	148514
LGPVRGPFPIIV	0	105786	0	552542	199842
LGTQY	0	0	0	6919838	35559696
LGTQYTDAPS	0	0	0	0	203966
LGTQYTDAPSFSDIPNP	0	0	0	0	225600
LGTQYTDAPSFSDIPNPIGSENSEKTTMP	0	166342	545472	1514078	1890642
LGTQYTDAPSFSDIPNPIGSENSEKTTMPLW	0	78136	0	0	0
LGY	0	17056718	47825072	72907112	69524088
LGYLEQL	0	100530	294386	0	0
LGYLEQLLR	0	362734	258834	0	0
LGYLEQLLRLK	0	107836	0	0	0
LHLPLP	0	0	0	8.37077e+06	21719680
LHLPLPL	0	130864	667190	339252	351836
LHLPLPLL	0	0	0	49254	72304
LHLPLPLLQS	0	0	0	0	80426
LHSMKEG	0	0	30542	0	0
LI/LI	0	0	0	0	3.84028e+06
LINNQFLPYPYY	0	74210	176410	0	213540
LINNQFLPYPYYAKPAA	0	134410	127026	0	0
LKKYKVPQLE	0	107130	187374	146606	0
LLQS	0	650977	2.65444e+06	4886457	3.20371e+06
LLQSW	0	2.61426e+06	9824973	16962402	7.6958e+06
LLQSWMHQPHQPLPPT	0	617444	1229910	512138	0
LLQSWMHQPHQPLPPTVMFPPQS	0	266782	393858	296252	0
LLQSWMHQPHQPLPPTVMFPPQSVLS	0	367452	859098	258758	52580
LLRLKKYKVPQ	0	0	51062	83428	0
LLYQEP	0	1.27858e+06	3723229	7.34033e+06	5786350
LLYQEPVLGP	0	0	0	117526	0
LLYQEPVLGPVRGPFP	0	124846	291082	1314642	244824
LLYQEPVLGPVRGPFPIIV	168984	3749010	5110730	1974864	542024
LNE	0	264958	1.02145e+06	1.92415e+06	2.9122e+06
LNEINQFYQKFPQY	0	699556	648910	0	0
LNEINQFYQKFPQYLQY	0	111502	0	0	0
LNENL	0	0	0	1.68991e+06	4.74382e+06
LNENLLR	49484	154754	0	0	0
LNENLLRFF	0	113816	0	0	0
LNF	0	2.81139e+06	10419158	21919710	28842506
LNFL	0	0	0	927463	1.33487e+06
LNPWDQ	0	0	0	0	1.63079e+06
LNPWDQVKRN	0	59280	151970	191482	426332
LNVPGE	0	0	0	4.83316e+06	47151112
LNVPGEIVES	0	0	0	0	264850
LNVPGEIVESLSSSEESITRI	0	0	0	91254	0
LNYY	0	0	0	2785251	7040299
LNYYQQKP	0	395242	131022	0	90704
LNYYQQKPVA	0	97028	87946	0	0
LNYYQQKPVAL	0	281886	193644	0	0
LPLPLLQSW	0	0	0	0	277040
LQAF	0	10113135	27824740	48234188	29424192
LQPEVMG	0	1121780	150564	144338	3486848
LQPEVMGVSK	0	178316	300646	235978	0
LQPEVMGVSKVKE	46498	668066	1226632	941820	0
LQPEVMGVSKVKEA	0	908218	872182	277918	0
LQPEVMGVSKVKEAM	0	48998	0	0	0
LQSW	0	4.26867e+06	13903272	32291540	56104884
LQSWMHQPHQPLPPT	0	155452	395572	324664	0
LQSWMHQPHQPLPPTVMFPPQS	0	161562	373142	224700	0
LQSWMHQPHQPLPPTVMFPPQSVLS	0	400870	417616	141134	0
LRLKKYKVPQ	0	0	0	40000	0
LSNTVPAKS	0	19930	0	0	33786
LSQSKVLPVPQ	0	192630	214048	290278	429784
LSQSKVLPVPQK	46348	627198	212502	2096012	1147782
LSQSKVLPVPQKA	0	418166	0	0	0
LSQSKVLPVPQKAVPYPQRDMP	0	83424	161270	0	0
LSQSKVLPVPQKAVPYPQRDMPIQAF	0	360942	197282	0	0
LSRYPSYG	0	159928	219166	0	173888
LTDVEN	0	379478	2948129	15544126	32907630
LTDVENLHLPLP	0	800442	1771788	2367812	1128298
LTDVENLHLPLPL	0	270326	2715666	4380930	741094
LTEEEKNR	0	88546	482926	314180	811534
LTEEEKNRLN	0	0	58200	98782	0
LTEEEKNRLNF	0	2579874	1835810	1476322	893960
LTEEEKNRLNFL	0	0	0	164162	0
LTL	0	0	0	0	1.92351e+06
LTLTDVEN	0	95768	295240	226146	176744
LTLTDVENLHLPLP	0	573182	666570	698236	83196
LTLTDVENLHLPLPL	0	170128	906138	653242	100134
LTQTPVVVPPF	0	89014	237388	204712	960404
LTQTPVVVPPFL	0	0	0	42320	222720
LTQTPVVVPPFLQPEVMG	0	52950	40620	44262	0
LTQTPVVVPPFLQPEVMGVSKVKE	0	0	0	49506	0
LVYPFPGP	0	0	0	70602	0
LVYPFPGPIP	0	0	0	50696	0
LVYPFPGPIPN	0	121260	88028	363670	191424
LVYPFPGPIPNSLPQ	0	0	0	0	77306
LVYPFPGPIPNSLPQNIPP	0	86132	165740	92454	36694
LVYPFPGPIPNSLPQNIPPLTQTP	0	0	147052	64796	0
LVYPFPGPIPNSLPQNIPPLTQTPV	0	0	178644	45560	0
LW	10158624	65797952	75290424	87248728	75771960
LY	0	0	292360	667250	1.60368e+06
LYQEP	0	965470	3742500	14479260	44114588
LYQEPV	0	0	0	1.14522e+06	3608564
LYQEPVLGP	0	0	95702	222772	417898
LYQEPVLGPVRG	0	87480	134552	33538	0
LYQEPVLGPVRGPFP	0	140666	943084	3762804	3184056
LYQEPVLGPVRGPFPI	0	0	86948	108562	180466
LYQEPVLGPVRGPFPIIV	140536	584880	3462058	2713106	699656
LYQGP	0	0	0	0	559290
LYQGPIV	0	58722	105948	362296	1237422
LYQGPIVLNP	0	0	0	151118	118688
LYQGPIVLNPWDQ	0	56374	246786	521784	841576
LYQGPIVLNPWDQVKR	0	341234	211846	461392	273372
LYQGPIVLNPWDQVKRN	0	5802842	9057014	7026644	4792896
LYQGPIVLNPWDQVKRNAVPITPT	0	1185110	170306	0	0
MAINPSKEN	0	61578	215494	124278	0
MAIPPKKNQDKTEIPTINT	0	172904	107972	0	0
MF	0	0	0	377847	1.15311e+06
MHQPHQPLPPT	0	69434	61546	607988	552696
MHQPHQPLPPTVMFPPQS	0	127324	267560	806884	137092
MHQPHQPLPPTVMFPPQSVLS	0	259670	747646	484722	0
MIG	0	0	0	1.30278e+06	5466873
MIGVNQE	0	0	0	180708	0
MKEG	0	0	429894	1.43669e+06	4194908
MKPWIQPK	0	0	0	0	231288
MKPWIQPKTK	0	0	170008	139888	0
MPFPKYP	0	0	53790	0	153222
MPIQAFLLYQEPVLGPVRGPFPIIV	74218	0	0	0	0
NAVPITPT	0	135860	66222	132678	183290
NIPPLTQTPVVVPPF	0	0	0	0	158580
NMAINPSKEN	0	36188	0	0	0
PE	0	1723023	3.31005e+06	5.57089e+06	6170376
PELFRQFYQLDA	0	57096	0	0	0
PEVIESPP	0	0	0	0	190218
PFAQTQSLVYPFP	0	0	0	59748	0
PFTESQSLTLTDVENLHLPLPLL	0	164110	0	0	0
PGEIVES	0	193302	540146	687220	0
PGEIVESLSS	78560	181220	0	0	0
PIQAFLLY	10350	0	0	0	0
PIQAFLLYQEPVLGPVRGPFPIIV	0	85096	0	144650	0
PLGTQYTDAPS	0	209818	503174	0	618004
PLTQTPVVVPPF	0	0	0	24332	0
PMIGVNQE	0	0	0	0	67800
PNSLPQNIPPLT	0	39614	0	0	0
PPFLQPEVMGV	0	0	0	23690	0
PPFLQPEVMGVS	0	55766	53572	52108	0
PPFLQPEVMGVSKVKEAM	0	32620	105146	49316	0
PPFLQPEVMGVSKVKEAMAPKHKE	0	0	41978	0	0
PPLTQTPVV	0	744174	538790	43492	0
PPLTQTPVVV	0	81598	243344	371296	1019964
PPLTQTPVVVP	47518	0	0	0	5480
PPLTQTPVVVPPFLQ	0	597294	997920	89064	42422
PPLTQTPVVVPPFLQPE	0	0	25452	0	0
PPLTQTPVVVPPFLQPEV	0	0	54194	65984	0
PPLTQTPVVVPPFLQPEVM	76950	0	0	0	0
PPLTQTPVVVPPFLQPEVMG	82376	243710	161648	43374	20894
PPLTQTPVVVPPFLQPEVMGVS	0	347810	0	49834	0
PPLTQTPVVVPPFLQPEVMGVSK	0	0	0	0	52294
PPLTQTPVVVPPFLQPEVMGVSKV	0	98534	0	63972	30914
PPLTQTPVVVPPFLQPEVMGVSKVK	0	61012	130108	0	0
PPLTQTPVVVPPFLQPEVMGVSKVKE	0	0	0	121922	0
PPQSVLS	0	89170	0	0	0
PQEVLNENLLRFFVA	0	89186	0	0	0
PQNIPPLTQTPVV	0	0	0	0	287396
PQNIPPLTQTPVVV	0	0	0	0	184096
PQNIPPLTQTPVVVPPFLQPEVMG	0	0	0	126286	105236
PQNIPPLTQTPVVVPPFLQPEVMGV	0	0	0	235274	0
PSGAWYYVP	27718	0	0	0	0
PVRGPFP	0	0	0	0	47238
PVVVPPF	0	0	0	0	20296
PY	0	0	2.97569e+06	6.4801e+06	5818856
PYPQRDMPIQAFLLY	223274	0	0	0	0
PYPYYAKPA	0	0	0	0	52626
QDKIHPFAQTQS	46632	439372	0	0	0
QEKNMAINPSKEN	0	24352	0	0	0
QEPVLGP	0	0	0	0	350100
QEVLNENLLRF	98398	208596	0	0	0
QGPIVLNPWDQ	0	0	0	0	129184
QGPIVLNPWDQVKRN	0	0	0	0	184568
QMEAESI	0	199690	0	0	0
QQQTEDELQDKIHPFAQTQS	0	388596	0	0	0
QR	0	303694	1.50808e+06	2.34276e+06	1460051
QTEDELQDKIHP	0	229698	0	179640	0
QTPVVVPPF	0	0	0	0	60682
RELEELNV	26284	75072	210658	0	0
RELEELNVP	56426	0	0	0	0
RELEELNVPG	20220	57144	57598	0	0
RELEELNVPGE	0	131348	325224	1070006	883198
RELEELNVPGEI	0	295194	126278	0	0
RELEELNVPGEIVES	0	0	92486	145810	157418
RELEELNVPGEIVESL	59788	98354	49666	215590	0
RELEELNVPGEIVESLSS	64632	107798	0	0	0
RELEELNVPGEIVESLSSS	0	103192	74012	0	0
RELEELNVPGEIVESLSSSEE	46534	1307304	148678	75022	0
RELEELNVPGEIVESLSSSEESIT	0	0	132618	0	0
RELEELNVPGEIVESLSSSEESITR	0	139746	0	0	0
RELEELNVPGEIVESLSSSEESITRI	193150	170104	193900	76648	0
RFFVAPFPE	0	108870	193048	251806	266624
RPKHPIKHQGLPQEVLNENLLRFF	72416	0	0	0	0
RQ	0	0	0	0	2.71246e+06
SEKTTMPLW	47562	0	0	0	0
SENSEKTTMPLW	33770	0	0	0	0
SFSDIPNPIGSENSEKTTMPLW	0	260928	0	0	0
SH	0	0	0	0	5.13479e+06
SK	0	49943.4	298843	1.12587e+06	2.88714e+06
SLPQNIPPLTQTP	0	0	0	0	255248
SLPQNIPPLTQTPVVVPPF	0	0	204170	777034	1672818
SLPQNIPPLTQTPVVVPPFL	0	0	0	0	93336
SLPQNIPPLTQTPVVVPPFLQPEVMG	0	0	155372	0	0
STEVFTKKTKLTEEEKNRLNF	0	275940	129640	0	0
SW	0	0	0	0	1.59816e+06
SWMHQPHQPLPPT	0	0	48642	111620	100654
TDAPSFSDIPNP	0	0	0	0	811822
TDAPSFSDIPNPIGSENSEKTTMP	0	0	127234	306518	845562
TDAPSFSDIPNPIGSENSEKTTMPL	0	0	0	0	99904
TDAPSFSDIPNPIGSENSEKTTMPLW	0	71190	0	0	0
TK	0	18258.7	20985.8	47358.5	134765
TKVIPYVRYL	0	110696	0	0	0
TLTDVENL	0	0	242876	245478	0
TQSLVYPFP	0	0	0	0	9534
TQTPVVVPPF	0	0	611724	323630	117996
TQTPVVVPPFLQPEVMGVSK	0	232568	92858	0	0
TQYTDAPSFSDIPNPIGSENSEKTTMP	0	0	0	0	112572
TVMFPPQS	0	0	0	75980	190328
VAL	0	1.71288e+06	3.62506e+06	5382786	5.11212e+06
VAPFPEVF	0	0	38128	49832	0
VAPFPEVFG	0	55660	55386	0	0
VAPFPEVFGK	108156	344190	206746	134454	0
VAPFPEVFGKEK	0	247872	414630	670434	99220
VAPFPEVFGKEKV	22742	72242	45050	0	0
VAPFPEVFGKEKVN	0	68408	0	0	0
VAPFPEVFGKEKVNE	263994	611522	7064806	2390460	0
VDDKHYQK	0	0	0	0	62818
VEP	0	0	0	0	517255
VEPFTESQS	0	0	176184	408706	598968
VEPFTESQSLT	0	0	121184	361110	0
VEPFTESQSLTLTDVENLHLPLP	0	0	355544	85364	0
VEPFTESQSLTLTDVENLHLPLPL	0	0	421390	0	0
VEST	0	0	0	0	3296148
VESTVAT	0	0	0	0	108478
VFGKEKVNE	0	504144	429176	500672	1030310
VFTKKTK	0	0	0	0	249592
VI/L	0	0	0	0	1.48026e+06
VIPY	0	6.52086e+06	20234238	43588220	38095216
VIPYVRY	0	0	230958	511832	0
VIPYVRYL	0	522716	602772	102078	0
VKEA	0	0	0	223093	563431
VKVT	0	0	0	0	1.35553e+06
VLGPVRGPFP	0	100156	680738	1624992	5502580
VLGPVRGPFPI	0	0	0	136898	507380
VLGPVRGPFPIIV	0	457994	1620016	1322442	1445058
VLNEN	0	978067	3.08495e+06	7.09224e+06	12022168
VLNENL	0	8944824	29646372	66173004	58728360
VLNENLLR	13482	486240	1866976	1373566	0
VLNENLLRF	143376	1123968	2062534	334428	107412
VLNENLLRFF	148928	790926	89294	0	0
VLPVPQK	0	37922	102642	548972	514638
VLPVPQKAVPYPQRDMP	0	98160	148386	111922	0
VLPVPQKAVPYPQRDMPIQAF	0	193862	0	0	0
VLS	0	5.48282e+06	8525600	15652572	22896742
VLSL	0	0	727484	2.93065e+06	4978481
VLSLSQSKVLPVPQK	28354	65146	0	0	0
VLSNTVPAKS	0	23308	50530	0	112472
VLSRYPS	0	0	0	0	106478
VLSRYPSYG	0	138918	1290412	0	1969050
VMFPPQS	0	74688	109344	674186	1540544
VMFPPQSVLS	0	299060	618378	760354	177336
VNE	0	0	60012.6	2.72396e+06	17397352
VNEL	0	0	0	0	1.19276e+06
VNQEL	0	0	553721	1.45265e+06	2201524
VNQELAYFYPELFRQ	0	57300	28714	0	0
VPLG	0	0	890766	7069769	55549972
VQ	0	0	0	527105	2.87379e+06
VQVTST	0	0	0	0	7321895
VQVTSTAV	0	78218	137252	0	0
VRGPFPI	0	0	0	0	246692
VRGPFPIIV	0	68678	320798	266852	397236
VRSPAQILQWQV	0	81304	142344	0	0
VSKVKEA	0	13908	96250	113426	0
VT	0	6.41909e+06	6.47867e+06	6948061	6093841
VTST	0	0	0	1.84345e+06	6.6846e+06
VVPPF	0	0	1.60866e+06	4.46808e+06	13145541
VVPPFLQPEVMG	0	0	0	63870	0
VVVPPF	0	0	0	331794	3.08829e+06
VVVPPFL	0	0	0	0	52500
VVVPPFLQPEVMG	0	0	0	92516	0
VYPFPGP	0	0	0	0	121476
VYPFPGPIPN	0	0	0	114516	263724
VYPFPGPIPNSLPQN	0	0	0	0	163872
VYPFPGPIPNSLPQNIPP	0	0	0	92536	140632
VYPFPGPIPNSLPQNIPPL	0	0	0	0	43268
VYPFPGPIPNSLPQNIPPLTQTP	0	0	0	132740	557992
VYPFPGPIPNSLPQNIPPLTQTPV	0	0	0	167604	339598
VYQHQKA	0	0	121642	135750	142090
WMHQPHQPLPPT	0	0	220576	543010	312700
WMHQPHQPLPPTVMFPP	0	0	34432	0	0
WMHQPHQPLPPTVMFPPQS	0	24448	120156	145170	0
WMHQPHQPLPPTVMFPPQSVLS	0	0	106742	112994	0
YKVPQLE	0	170168	86368	249856	0
YKVPQLEIV	0	87836	0	0	0
YLGYLEQL	0	0	150104	0	0
YQGPIVLNPWDQ	0	0	0	0	170708
YQGPIVLNPWDQVKRN	0	0	103968	145468	425650
YVP	0	0	0	2250569	16455774
YVPLG	0	0	0	1.5803e+06	7643448
YVPLGTQY	0	0	0	203686	498244
YVPLGTQYT	0	0	0	0	17388
YVPLGTQYTDAPS	0	0	0	0	397124
YVPLGTQYTDAPSFSDIPNP	0	0	0	0	202730
YVPLGTQYTDAPSFSDIPNPIGSENSEKTTMP	0	0	288144	1202902	986356
YVPLGTQYTDAPSFSDIPNPIGSENSEKTTMPLW	0	90926	0	0	0
YVR	0	0	588017	1.31783e+06	1.09497e+06
YYVP	0	0	0	4.32177e+06	16664686
YYVPLGTQYTDAPSFSDIPNPIGSENSEKTTMP	0	0	148512	151366	0

## Sheet: Screening of bitter peptide
Trypsin			Alcalase			Papain			Neutrase
sequence	importance (%)		sequence	importance (%)		sequence	importance (%)		sequence	importance (%)
VNELSK	100		IHPF	100		EVI	100		FYQ	100
TDAPSFSDIPNPIGSENSEK	84.8095		QY	95.0925		KEDVPSE	92.6068		LGTQYTDAPSFSDIPNPIGSENSEKTTMP	94.477
GLPQEVLNENLLR	82.9275		FM	94.1771		YI	86.6323		ILQWQV	93.8788
DMPIQAFLLYQEPVLGPVR	82.6106		SLTL	92.4462		EPMIG	85.5253		LYQGPIVLNPWDQ	92.5427
RNAVPITPTLNR	80.7499		TVQ	92.1043		LY	84.1538		SK	90.9704
HQGLPQEVLNENLLR	79.5709		RFF	91.6067		YPFPGPIPNSLPQ	83.8121		IT	88.8842
YVPLGTQYTDAPSFSDIPNPIGSENSEK	79.2705		TI	90.2531		VPPFL	83.4411		INT	88.1562
FMAIPPK	79.0936		VDDKHYQKAL	90.1272		AW	80.5433		IQYV	87.5337
VPQLEIVPNSAEER	78.2318		VF	89.9699		VPLG	79.6627		HIQKEDVPSERY	87.2936
LLYQEPVLGPVR	78.1584		LEQLLRLK	87.9509		IPPLT	79.2447		VLNEN	86.8845
AVPYPQR	77.8816		GYL	87.5785		FF	79.2376		IE	85.0035
LTEEEK	77.6353		AQ	85.4652		GYLE	79.0928		IVPNSAEER	84.625
SKDIGSESTEDQAMEDIK	77.6097		LQSW	84.3155		IPNPIG	77.5264		IHAQQKEPM	81.9641
QEPVLGPVR	77.4332		IVPN	83.6874		LIN	76.9878		ISQ	80.4436
ALNEINQFYQK	76.6271		KTTMPLW	83.4986		SK	76.5991		LYQGPIV	80.1049
YQQKPVALINNQFLPYPY	76.0213		VLNENLLRFF	83.3464		APFPEVF	76.0817		IT	79.8748
YPVEPFTESQSLTLTDVENLHLPLPLLQ	75.5036		SLPQ	83.1298		TAV	75.9297		VLGPVRGPFP	78.7922
FFSDK	74.8912		QWQVL	82.8372		AF	75.1774		LQSW	77.4672
ESIISQETYKQEK	74.0347		ST	82.5708		YPVEPFT	74.9243		ILQWQ	77.4285
EDVPSERY	73.3358		TQ	82.2509		IQ	74.039		LNE	77.395
VPLGTQYTDAPSFSDIPNPIGSENSEK	71.6416		DAYPSGA	82.2174		TPVV	72.2664		IF	77.3639
TTMPLW	71.2996		LEQL	81.8328		VK	71.3732		FIF	75.482
ALNEINQFY	70.9754		LQ	81.2847		SW	70.4678		TK	74.7098
VR	70.7834		TESQ	80.5552		LPQ	70.0832		RFFVAPFPE	73.1808
NMAINPSK	70.2614		AVPITPT	79.8407		VM	69.2127		LNF	72.8964
AVPYPQR	69.8649		AF	79.7511		NENLL	67.2628		FM	72.7173
YPVEPFTESQSL	69.8182		SM	79.6981		RELEELN	64.7146		LYQEP	72.1619
QVLSNTVPAK	69.4092		EEI	79.4519		AVE	61.8148		VMFPPQS	72.1432
LNFLK	69.2422		VAPFPE	78.2787		LTDVE	61.3106		PE	71.6857
TK	68.7726		YSI	77.3459		PFPIIV	55.587		LTDVEN	71.3416
KVPQLEIVPNSAEER	68.7462		VNELSKDIGSE	77.224		SLPQ	52.9757		RELEELNVPGEIVES	70.9246
KFQSEEQQQTEDELQDK	68.3501		DVENL	76.4284		YPELF	52.7647		IS	70.5549
VLPVPQK	68.3192		AVESTVATL	76.139		LTL	52.185		ALNE	70.2558
EMPFPK	68.0285		TEEVKIT	76.0612		EPVL	52.085		IGVNQE	70.1075
GPFPIIV	67.4897		ALT	75.4688		IK	49.8049		VPLG	70.0965
YLGYLEQLLR	67.3609		NYYQQKPVAL	75.288		HKEMPFPK	49.6717		II	69.5498
SLPQNIPPLTQTPVVVPPFLQPEVMGVSK	67.1782		SLSQSKVLPVPQ	74.7289		LPLPL	48.4981		LEQ	69.2649
PFPK	66.2252		IE	74.5874		II	47.6727		PPLTQTPVVV	68.729
EDVPSER	66.0989		ARHPHPHLSFM	74.391		SMK	43.4132		LDAYPSGAWYYVP	68.6719
VAPFPEVFGK	65.7149		SVL	74.3176		MI	42.989		LNPWDQVKRN	68.413
EPMIGVNQELAYFYPELFR	65.2804		GLPQE	74.3054		YQLD	41.6638		IIV	67.6282
EAMAPK	63.6981		ALPQYL	73.322		AM	40.4833		VVPPF	66.7022
PIQAFLLY	63.6703		LY	72.8423		PK	40.1802		LSQSKVLPVPQ	66.1508
LYQGPIVLNPWDQVK	63.5529		QQKPVAL	72.5155		RELEELNVPG	39.782		IE	65.9591
YI	63.3179		HIQ	72.4683		YVL	39.7756		VLS	65.6269
EK	63.046		IH	72.291		DELQDKIHPFAQ	39.5539		LDAYPSGAW	65.3386
FALPQYL	62.9734		AVESTVATLEDSPEVIES	72.1797		VPYPQ	39.1541		GY	64.7576
PQLEIVPNSAEERLHSM	62.4249		DVPSERYLGY	72.0039		YPSG	38.8096		VMFPPQS	64.5739
EPMIGVNQELAYFYPELF	62.424		GTQ	71.9745		VLPVPQK	38.7625		SLPQNIPPLTQTPVVVPPF	64.4224
AMKPW	62.058		YTDAPSFSDIPNPIGSENSE	71.8511		DAPSFS	38.1527		LYQGPIV	63.4496
SPAQILQW	61.6527		IR	71.8223		GY	37.6159		LQPEVMG	62.5728
NIPPLTQTPVVVPPFLQPEVMGVSK	61.0165		NENLLRF	71.7164		IF	37.0544		FYPE	61.7682
PVPQK	60.3745		PPLTQTPVVVPPFLQPEVMGVS	71.5545		YYQ	35.4141		MKEG	60.7875
YQK	59.3699		TQSLVYPFPGP	70.6935		DAPSF	35.1857		VYQHQKA	59.1487
YIPIQY	59.1447		VT	70.6471		LYQ	35.0778		YQGPIVLNPWDQVKRN	58.8175
FVAPFPEVFGK	56.806		SQSL	70.413		IPTIN	33.4413		IGSENSEKTTMP	56.9626
EGIHAQQK	56.7484		RYLGYLEQ	70.3962		VLPVPQ	29.154		LYQEPVLGPVRGPFPI	54.6794
QSLTLTDVENLHLPLPLLQSW	56.3243		LNEINQFYQKFPQYL	70.187		IE	29.1373		IR	54.4596
LYQEPVLGPVR	54.5591		TLTDVENL	70.1712		YPSY	28.8466		LYQEPVLGP	54.1264
LPLPLLQSW	54.4058		IAKYIPIQYVL	69.8189		IPIQ	12.8307		AI	52.0396
AK	52.9521		FF	69.7922		HPIK	11.9983		LGPVRGPFP	48.148
SNTVPAK	50.4793		SI	69.6036		IE	11.3814		AY	47.6763
PQNIPPLTQTPVVVPPFLQPEVMGVSK	0		EQLL	69.4992		IIV	10.4823		AV	47.6152
DIPNPIGSENSEK	43.7428		VFGKEKVNEL	69.4578		AQ	10.1648		AVPITPTL	47.4519
RELEELNVPGEIVESL	42.6577		QVL	69.3654		IPTI	9.72008		VEPFTESQS	45.6162
NAVPITPTLNR	40.5399		ALPQ	68.8571		EIVPN	9.70304		IQPE	44.8699
PPQSVLSLSQSK	35.3483		GYLEQLLRLK	68.6585		LPQE	9.21861		TDAPSFSDIPNPIGSENSEKTTMP	44.6911
EKVNELSK	35.2087		KYKVPQLEIVPN	68.5151		IA	9.01066		AF	44.1839
QR	34.8567		II	68.4975		TPTL	8.66741		FLL	43.9884
KH	33.3296		EQL	68.3641		VPGEIVE	8.31374		VNQEL	41.0798
LSQR	32.8849		FVAPFPE	67.7767		FV	8.29998		VLSL	40.5506
EVVR	31.3759		EK	67.6787		FIF	8.0039		LY	39.3662
YK	30.4668		LFRQF	67.2458		LFR	7.85279		VNE	38.7466
SKVLPVPQK	30.1694		ALPQYLKTVYQHQ	67.2297		PVPQ	7.71803		IPPLTQTPVVVPPF	38.3165
FFVAPFPEVFG	29.473		SLTLT	66.9498		VPITPTL	7.67239		EK	35.0039
VLPVPQK	29.4398		GKEKVNEL	66.9173		LPYPYYA	7.06961			0
RELEELNVPG	27.9143		YLYQGPIVLNPWDQVKRN	66.7714		WYY	7.04583		HKEMPFPKYPVEP	23.1536
APK	27.8637		GLPQ	66.4789		PIK	7.03611		VYPFPGPIPNSLPQNIPPLTQTP	21.6197
LPQEVLNENLLR	26.6301		ELAYFYPE	66.0732		PPK	6.9644		YVPLG	19.977
RFFVAPFPEVFGK	25.5554		TIASGEPTSTPTTEAVE	65.9492		EPVLG	6.82729		EPVLGPVR	18.9424
INK	25.3083		DAYPSGAW	65.855		LPYPYY	6.70562		IQ	18.6728
EGIHAQQKEPMIGVNQELAY	25.2334		LEQ	65.7605		SM	6.55731		LNFL	18.1874
HPHPHLSFM	23.6605		SK	65.7453		VYPFPGPIPN	6.34375		VYPFPGPIPNSLPQNIPP	18.0553
QFYQLDAYPSGAWYYVPLGTQY	22.7638		QELAYFYPE	65.6914		ELEELNVPG	6.24864		FYQL	17.2049
RELEELNVPGEIVESLSSSEESITR	22.7101		QI	65.2808		NLH	6.15383		FSDIPNPIGSENSEKTTMP	16.7102
YYVPLGTQYTDAPSFSDIPNPIGSENSEK	21.973		YQL	65.0522		TF	5.82702		LEEL	15.8997
TQTPVVVPPFLQPEVMGVSK	21.799		FYPELF	64.5173		APFPE	5.81645		TVMFPPQS	15.5762
EQKHIQKEDVPSERYLGYLEQLLR	21.7659		QQKPVALIN	64.0147		EMPFPK	5.75809		LDAYPSG	15.2081
DMPIQAFLLY	21.0215		HLPLPLLQS	63.7281		GYL	5.67589		VKEA	15.0655
SPAQILQWQVLSNTVPAK	20.781		YTDAPSFSDIPNPIGSENSEKTTMPLW	63.0217		PQ	5.6463		VYPFPGPIPNSLPQNIPPLTQTPV	14.7496
DMPIQAFLLYQEPVLGPVRGPFPIIV	20.0791		AVE	62.9539		VN	5.60254		VQ	14.6345
DDKHYQK	18.2243		AVESTVA	62.7886		DELQDKIHPF	5.3093		HKEMPFPKYP	14.1264
YKVPQLEIVPN	17.9185		GLPQEVL	62.6444		VIE	5.27415		IK	13.5214
MAIPPKK	17.1228		VM	61.9639		AY	5.09124		LNENL	13.5045
HPIKHQGLPQEVLNENLLR	15.9301		EVLNE	61.8911		LAL	4.94727		MIG	13.2847
TVDMESTEVFTK	14.5783		INNQFLPYPY	61.7346		VF	4.73984		AQQKEPMIG	12.5766
YKVPQLEIVPNSAEER	14.4065		AIPPKKNQDKTEIPTIN	61.6079		YY	4.59023		LEE	12.4868
IGVNQELAYFYPELFR	13.3162		EMPFPKYPVEPFTE	61.2199		DAPSFSD	4.5451		MF	12.4565
PPLTQTPVVV	13.0686		NEINQFYQKFPQYLQYL	61.1755		FPQYLQ	4.39981		EMPFPKYP	12.2727
QFYQLDAYPSGAWY	11.9726		SLVYPFPGPIPNSL	60.0992		SY	4.38672		PVRGPFP	12.2294
EGIHAQQKEPMIGVNQELAYF	10.7969		QAQPTTM	60.0901		TDVE	4.26903		YYVP	11.366
HIQKEDVPSER	10.7954		SQSKVLPVPQKAVPYPQRDMPIQAF	59.4697		AK	4.22121		LHLPLP	11.2504
IPPLTQTPVVVPPFLQPEVMGVSK	9.38713		INTVQVT	59.3786		AI	3.90063		IVES	11.1215
PPLTQTPVVVPPFLQPEVMGVSK	9.37584		PQNIPPLTQTPVV	58.8836		YPFPGPIPN	3.74589		LNVPGE	10.9162
AQILQWQVLSNTVPAK	7.80673		WQVL	58.6321		FR	3.40282		VLGPVRGPFPI	10.8749
DMPIQAFLLYQEPVLGPVRGPFPII	6.42958		FFVAPFPE	58.4063		VY	3.00603		TQYTDAPSFSDIPNPIGSENSEKTTMP	10.8685
HPHPHLSFMAIPPK	6.42538		RYL	58.2574		IV	2.95201		YVPLGTQY	10.8253
FFSDKIAK	6.38781		TQTPVVVPPFLQPEVMG	58.2496		PFPEVF	2.75133		LNYY	10.2121
EGIHAQQKEPMIGVNQELAYFYPELFR	6.14978		TI	58.2024		GPFPII	2.74721		VTST	9.74708
QFYQLDAYPSGAWYYVPLGTQYT	5.93817		EPMIGVNQELAYFYPELF	57.8826		VI	2.58718		IGVNQEL	9.35556
VLSRYPSYGLNY	5.86689		SW	57.8048		EPFTE	2.51574		ELN	9.03518
SWMHQPHQPLPPTVMFPPQSVLSLSQSK	5.60595		ANEEE	57.4693		LPVPQ	2.3592		GAWY	8.74746
ITVDDKHYQK	5.43461		LYQEPVLGPVRGPFPIIV	57.1144		DKIHPFA	2.19165		IEKFQSEEQQQ	8.59034
HQGLPQEV	4.8734		PPLTQTPVVVPPFLQPEVMGVSKV	57.0563		KEMPFPK	2.19036		LTQTPVVVPPFL	8.55443
PIQAFLLYQEPVLGPVRGPFP	4.8629		NLL	56.9222		SFF	2.02241		LHLPLPLL	8.45748
PPLTQTPVVVPPFLQPEVMGVSKV	4.7774		LLY	56.789		EKVN	1.92646		VYPFPGPIPN	8.19536
LNVPGEIVESLSSSEESITR	4.42157		YYVPL	56.3942		FM	1.71695		LYQEPV	7.80732
SFMAIPPKK	4.40723		VPQLEIVPN	56.0859		HIQ	1.64932		GAWYYVP	7.58265
TDAPSFSDIPNPIGSENSEKTTMPLW	4.39322		TDVENL	55.9552		KNQDKTE	1.59623		YQGPIVLNPWDQ	7.03065
PIQYVLSRYPSYGLNYY	4.00689		ATLEDSPEVIESPPEIN	55.8236		MF	1.4188		PVVVPPF	6.6028
KYKVPQLEIVPNSAEER	3.98577		YLQY	55.6432		PVEPFTESQSL	1.31584		YVP	6.53749
YPVEPFTESQSLTLTDVENLHLPLPLLQSWM	3.76008		SGEPTSTPTTEAVE	55.5713		SR	0.718862		FLQPEVMG	6.2253
HPHPHLSFMAIPPKK	3.58873		RDMPIQAF	55.5264		TI	0.696074		AFLLYQEPVLGPVRGPFP	6.12703
VLNENLLRFFVAPFPEVFGK	3.54846		QE	55.4372		IR	0.636179		ER	5.81686
QLDAYPSGAWYYVPLGTQYTDAPSFSDIPNPIGSENSEK	3.47511		EVI	55.3817		DIK	0.630721		SH	5.78743
RELEELNVPGEI	3.46169		VYPFPGPIPNSL	55.0916		IVLN	0.597254		AYPSGAW	5.78117
YKVPQLEIVPNS	3.40848		QYTDAPSFSDIPNPIGSENSEKTTMPLW	55.0437		AV	0.553259		AW	5.68574
NNQFLPYPYYAKPAAVR	3.33654		HIQKE	54.8953		PPFLQPEVM	0.552219		AVPYPQ	5.65465
IVESLSSSEESITR	3.31403		VI	54.4996		TEDELQDKIHPFA	0.534087		FY	5.51104
PFPEVFGK	3.25273		KF	54.1839		TPVVV	0.533292		LGTQY	5.39109
FPQYLQYLYQGPIVLNPWDQVKR	3.13435		NLHLPLPLLQ	54.1339		HSM	0.506943		LEI	5.2999
EGIHAQQKEPM	3.06535		VIPYVRYL	54.0034		YLY	0.505407		FRQF	5.18926
TVDMESTEVFTKK	2.98715		TKLTEEEKNRLNFL	53.8467		GK	0.504304		HLPLPLLQSW	5.14203
EQLSTSEENSKK	2.92235		LGTL	53.6393		IS	0.503899		VYPFPGP	4.97857
SSEESITR	2.71461		NQFLPYPY	53.5645		PEVFGKEK	0.501229		INTI	4.71858
QQKEPMIGVNQELAYFYPELFR	2.63554		RYPSYGLN	52.6868		NLL	0.500205		AQQKEPM	4.6934
RELEELN	2.44763		TLTDVE	52.1885		LD	0.478587		NIPPLTQTPVVVPPF	4.45144
DMPIQAFLLYQEPVLGPVRGPFPI	2.14133		YYQQKPVALIN	52.1471		EELNVPG	0.467845		FAQTQSLVYPFPGP	4.36379
SPAQILQWQ	2.12448		ATEEVKIT	51.6414		YPFPGPIPNS	0.395284		VEP	4.28081
NRLNFLKK	2.04057		EDELQDKIHPF	51.4524		MPI	0.349572		VNEL	4.11789
QFLPYPYYAKPAAVR	2.00127		AVESTVATLEDSPEV	51.3332		TEDELQDKIHPFAQ	0.280143		IASGEPTSTPTTE	4.07477
MHQPHQPLPPTVMFPPQSVLSLSQSK	1.98115		SNTVPAK	51.0794		FA	0.254086		AVPYPQRDMPI	3.7839
YQKFPQYLQYLYQGPIVLNPWDQVKR	1.94952		KVPQLEIVPN	51.0429		VPI	0.200372		LYQGP	3.73705
APFPEVFGK	1.865		FYPE	50.9516					VEST	3.71691
PGEIVESLSS	1.78643		NI	50.8173					PQNIPPLTQTPVVV	3.62127
LSQSKVLPVPQKAVPYPQR	1.78643		PN	50.5141					LGTQYTDAPSFSDIPNP	3.58381
SVLSLSQSK	1.78643		TIASGEPTSTPTTEAVEST	50.4791					QGPIVLNPWDQVKRN	3.57591
HPHLSFMAIPPK	1.70006		ELAY	50.3229					VDDKHYQK	3.53973
ALNEINQFYQKFPQYLQYLYQGPIVLNPWDQVK	1.58162		EAMAPKHKEM	50.3013					IGP	3.46173
NRLNFLK	1.41568		KEDVPSERYLGYLE	50.2798					LGPVRGPFPI	3.45626
DMPIQAFLLYQEPVLGPVRGP	1.27442		YQGPIVLNPWDQVKR	48.8337					MKPWIQPK	3.4371
YIPIQYVLSR	0.848655		YLGY	48.7435					YVPLGTQYTDAPSFSDIPNP	3.41497
LRFFVAPFPEVFGK	0.600932		PLLQ	48.5836					SLPQNIPPLTQTP	3.3014
YYAKPAAVR	0.00229681		FY	48.4506					AK	3.20153
	0		IPPLTQTPVVVPPFLQPEVM	48.3139					SW	3.07341
			AVPITPT	48.307					FTESQS	3.03209
			PEQ	47.1549					FAQ	2.91587
			VIESPPEIN	47.0371					AKPAA	2.91112
			YLKTVYQHQ	46.0212					VESTVAT	2.89014
			AVRSPAQIL	45.8774					PPLTQTPVVVPPFLQPEVMGVSK	2.80891
			FVAPFPE	45.3555					QTPVVVPPF	2.78952
			TDVE	45.1989					LPLPLLQSW	2.77956
			GYLEQL	44.9499					TDAPSFSDIPNPIGSENSEKTTMPL	2.76743
			TIASGEPTSTPTTE	44.7145					QGPIVLNPWDQ	2.70685
			TIAS	44.0153					VVVPPFL	2.6147
			IR	44.0029					IAKYIPI	2.5996
			HQPHQPLPPTVMFPPQSVL	43.8685					GLPQEVLNENL	2.57662
			PK	43.7023					PQNIPPLTQTPVV	2.52732
			LAY	43.4604					EDELQDKIHP	2.52394
			APK	43.0131					AYPSGAW	2.49879
			KVPQLE	42.8101					PEVIESPP	2.45561
			VVRNANEEE	42.3296					IEK	2.42594
			RLH	42.2178					LGTQYTDAPS	2.37637
			GAW	41.8365					PMIGVNQE	2.31261
			VFTK	41.8045					VI	2.26135
			VLNE	40.7343					IVLNPWDQ	2.24158
			GPVRGPFPIIV	40.3909					IHAQQKEPMIGV	2.20964
			VA	40.3483					LNVPGEIVES	2.20093
			NQFLPYPYYAKPA	40.2402					IV	2.12117
			MPIQAFLLYQEPVLGPVRGPFPIIV	39.433					FYQKFPQ	2.02625
			TQTPVVVPPFLQPEVM	38.6119					ILT	1.92502
			TLT	38.1817					LVYPFPGPIPNSLPQ	1.92059
			TAV	37.874					LTL	1.80999
			SRYPSYGLN	37.7491					VRGPFPI	1.61864
			QDKTEIPTIN	37.7217					VVVPPF	1.55976
			QELAYFYPELF	37.2017					VYPFPGPIPNSLPQN	1.2718
			LAYFYPELFRQF	37.1412					FSDIPNP	1.18875
			AFL	37.0061					VFTKKTK	1.09407
			TMPLW	36.8679					ATLEDSPEVIESPPEINT	0.973943
			LEQLLRL	35.077					LHLPLPLLQS	0.973943
			LCSTFCKEVVRN	33.5517					LNPWDQ	0.841499
			QYLYQGPIVLNPWDQVKRN	32.9815					VKVT	0.495362
			GTQY	32.4188					AWY	0.423499
			LEEL	30.1394					RQ	0.423292
			NEEE	29.3306					SLPQNIPPLTQTPVVVPPFL	0.340974
			QAQPTTM	26.9289					AYPSGAWY	0.328166
									PYPYYAKPA	0.322058
									FSDK	0.315831
									IIS	0.310195
									VLSRYPS	0.287199
									GAW	0.280766
									YVPLGTQYT	0.263002
									IR	0.220882
									VYPFPGP	0.212758
									VQVTST	0.180004
									IKHQGLPQE	0.167196
									YVPLGTQYTDAPS	0.154861
									QEPVLGP	0.154861
									TDAPSFSDIPNP	0.113569
									IASGEPTSTPTTEAVEST	0.113569
									II	0.107313
									TQSLVYPFP	0.101234
									GE	0
									VYPFPGPIPNSLPQNIPPL	0
									%IncMSE	0
										0

## Sheet: trypsin-alcalase combination 
	bitterness		length distribution of HAA-BAA type peptides				length distribution of HAA-HAA type peptides
	average	SD	2-4	5-9	10-14	15-30	2-4	5-9	10-14	15-30
Trypsin	3.09167	0.787005	0.096774	0.306452	0.322581	0.274194	-	-	-	-
Alcalase	1.59838	0.21623	-	-	-	-	0.315789	0.192982	0.175439	0.315789
Trypsin+Alcalase	0.87009	0.476766	0.285714	0.380952	0.238095	0.095238	0.232143	0.196429	0.214286	0.357143
